# Supplementary material for: Critical Investigation of the Usability of Hepatoma Cell Lines HepG2 and Huh7 as Models for the Metabolic Representation of Resectable Hepatocellular Carcinoma
Source: MDPI journal article supplement (doi:10.3390/cancers14174227), 2022-08-30
Supplement: s1 [file s1]

# Critical investigation on the usability of hepatoma cell lines HepG2 and Huh7 as models for the metabolic representation of resectable hepatocellular carcinoma

Gerda Schicht<sup>1,2†</sup>, Lena Seidemann<sup>1,2†</sup>, Rene Haensel<sup>2</sup>, Daniel Seehofer<sup>1,2</sup> and Georg Damm<sup>1,2\*</sup>

<sup>1</sup> Department of Hepatobiliary Surgery and Visceral Transplantation, University Hospital, Leipzig University, 04103 Leipzig, Germany

<sup>2</sup> Saxonian Incubator for Clinical Translation (SIKT), Leipzig University, 04103 Leipzig, Germany

\* Correspondence: Georg.Damm@medizin.uni-leipzig.de

† These authors contributed equally to this work.

**Table S1.** Antibodies for Immunofluorescence.

| Product name                                                      | Type                | Host   | Dilution | Product Number | Supplier                              |
|-------------------------------------------------------------------|---------------------|--------|----------|----------------|---------------------------------------|
| anti-Cytokeratin 18                                               | Primary anti-body   | Rabbit | 1:150    | ab52948        | Abcam, Cambridge, UK                  |
| anti-Cytokeratin 19                                               | Primary anti-body   | Mouse  | 1:1000   | ab7754         | Abcam, Cambridge, UK                  |
| anti-Vimentin                                                     | Primary anti-body   | Mouse  | 1:500    | sc-373717      | Santa Cruz Biotechnology, Dallas, USA |
| anti-Fibroblasts, clone TE-7                                      | Primary anti-body   | Mouse  | 1:200    | CBL271         | Sigma-Aldrich, St. Louis, USA         |
| anti-Actin, $\alpha$ -Smooth Muscle                               | Primary anti-body   | Mouse  | 1:400    | A2547-2ML      | Sigma-Aldrich, St. Louis, USA         |
| Donkey F(ab') <sub>2</sub> Anti-Mouse IgG H&L (Alexa Fluor® 488)  | Secondary anti-body | Mouse  | 1:1000   | ab181289       | Abcam, Cambridge, UK                  |
| Donkey F(ab') <sub>2</sub> Anti-Rabbit IgG H&L (Alexa Fluor® 647) | Secondary anti-body | Rabbit | 1:1000   | ab181347       | Abcam, Cambridge, UK                  |

**Table S2.** Gene specific primers commercially purchased from Qiagen (Hilden, Germany).

| Gene Name | Article Description                       | Article Number |
|-----------|-------------------------------------------|----------------|
| ACACA     | Hs_ACACA_2_SG QuantiTect® Primer Assay    | QT01670053     |
| ACACB     | Hs_ACACB_1_SG QuantiTect® Primer Assay    | QT00996352     |
| AKT1      | Hs_AKT1_1_SG QuantiTect® Primer Assay     | QT00085379     |
| AKT2      | Hs_AKT2_1_SG QuantiTect® Primer Assay     | QT00085001     |
| AKT3      | Hs_AKT3_1_SG QuantiTect® Primer Assay     | QT00082138     |
| BDH1      | Hs_BDH1_1_SG QuantiTect® Primer Assay     | QT01673525     |
| FOXO1     | Hs_FOXO1_1_SG QuantiTect® Primer Assay    | QT00044247     |
| GAPDH     | Hs_GAPDH_vb.1_SG QuantiTect® Primer Assay | QT02504278     |
| GSK3A     | Hs_GSK3A_1_SG QuantiTect® Primer Assay    | QT00075306     |
| GSK3B     | Hs_GSK3B_1_SG QuantiTect® Primer Assay    | QT00057134     |
| GUSB      | Hs_GUSB_1_SG QuantiTect® Primer Assay     | QT00046046     |
| HIF1A     | Hs_HIF1A_1_SG QuantiTect® Primer Assay    | QT00083664     |

| Gene Name     | Article Description                     | Article Number |
|---------------|-----------------------------------------|----------------|
| <i>HMGCL</i>  | Hs_HMGCL_1_SG QuantiTect® Primer Assay  | QT00088921     |
| <i>LDHA</i>   | Hs_LDHA_1_SG QuantiTect® Primer Assay   | QT00001687     |
| <i>MAPK1</i>  | Hs_MAPK1_1_SG QuantiTect® Primer Assay  | QT00065933     |
| <i>MAPK3</i>  | Hs_MAPK3_3_SG QuantiTect® Primer Assay  | QT02589321     |
| <i>PFKL</i>   | Hs_PFKL_1_SG QuantiTect® Primer Assay   | QT00044814     |
| <i>RRN18S</i> | Hs_RRN18S_1_SG QuantiTect® Primer Assay | QT00199367     |

Table S3. RT-qPCR cycling conditions.

| Step                         | Time    | Temperature |
|------------------------------|---------|-------------|
| PCR initial heat activation  | 5 min   | 95°C        |
| Denaturation                 | 10 s    | 95°C        |
| Combined annealing/extension | 30 s    | 60°C        |
| Number of cycles             | 35–40 s |             |

Table S4. Antibodies for Western blotting.

| Protein    | Type             | Host   | Dilution | Product Number | Supplier                                      |
|------------|------------------|--------|----------|----------------|-----------------------------------------------|
| ACACA      | Primary antibody | Rabbit | 1:1000   | 4190S          | Cell Signaling Technology, Inc., Danvers, USA |
| ACACB      | Primary antibody | Rabbit | 1:1000   | 8578S          | Cell Signaling Technology, Inc., Danvers, USA |
| AKT1       | Primary antibody | Rabbit | 1:1000   | 75692S         | Cell Signaling Technology, Inc., Danvers, USA |
| AKT2       | Primary antibody | Rabbit | 1:1000   | 3063S          | Cell Signaling Technology, Inc., Danvers, USA |
| AKT3       | Primary antibody | Rabbit | 1:1000   | 3788S          | Cell Signaling Technology, Inc., Danvers, USA |
| BDH1       | Primary antibody | Mouse  | 1:1000   | MA5-15594      | Invitrogen, Carlsbad, USA                     |
| ERK1/MAPK3 | Primary antibody | Mouse  | 1:1000   | MA5-15896      | Invitrogen, Carlsbad, USA                     |
| ERK2/MAPK1 | Primary antibody | Rabbit | 1:1000   | PA5-17710      | Invitrogen, Carlsbad, USA                     |
| FOXO1      | Primary antibody | Rabbit | 1:1000   | 9454S          | Cell Signaling Technology, Inc., Danvers, USA |
| GSK3A      | Primary antibody | Rabbit | 1:1000   | 4337S          | Cell Signaling Technology, Inc., Danvers, USA |
| GSK3B      | Primary antibody | Mouse  | 1:1000   | 9832S          | Cell Signaling Technology, Inc., Danvers, USA |
| HK2        | Primary antibody | Rabbit | 1:1000   | 2867S          | Cell Signaling Technology, Inc., Danvers, USA |
| HIF1A      | Primary antibody | Rabbit | 1:1000   | 14179S         | Cell Signaling Technology, Inc., Danvers, USA |
| HMGCL      | Primary antibody | Rabbit | 1:3000   | PA5-21996      | Invitrogen, Carlsbad, USA                     |
| LDHA       | Primary antibody | Rabbit | 1:1000   | 3582S          | Cell Signaling Technology, Inc., Danvers, USA |

| Protein                           | Type               | Host  | Dilution | Product Number | Supplier                              |
|-----------------------------------|--------------------|-------|----------|----------------|---------------------------------------|
| PFKL                              | Primary antibody   | Mouse | 1:500    | sc-393713      | Santa Cruz Biotechnology, Dallas, USA |
| IRDye® 800CW Goat anti-Rabbit IgG | Secondary antibody | Goat  | 1:10000  | 926-32211      | LI-COR Biosciences, Lincoln, USA      |
| IRDye® 680RD Goat anti-Mouse IgG  | Secondary antibody | Goat  | 1:10000  | 926-68070      | LI-COR Biosciences, Lincoln, US)      |

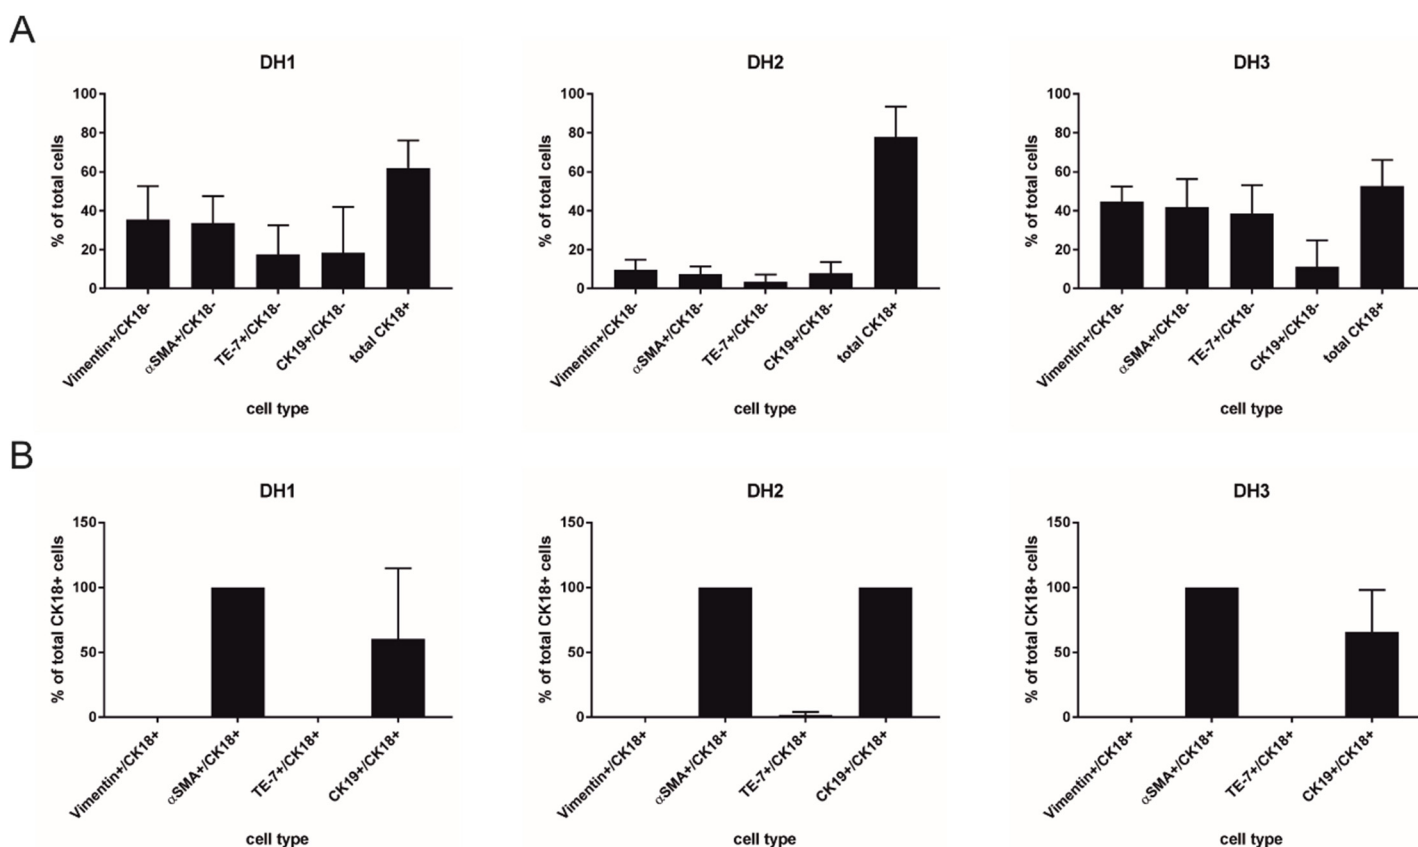

**Figure S1.** Quantitative evaluation of PHC immunofluorescence staining.

Immunofluorescence staining of PHCs of donor DH1 - DH3 were used for marker quantification. (A) Sole expression of analyzed cell markers for hepatic cells (CK18), fibroblasts (Vimentin,  $\alpha$ -SMA, TE-7) and cholangiocytes (CK19). (B) Co-expression of CK18+ with fibroblast (Vimentin,  $\alpha$ -SMA, TE-7) and cholangiocyte (CK19) markers. Five random taken images per well were acquired at 20 x magnification using laser scanning microscopy and the cells were counted based on their specific staining. Total cells were counted by Hoechst nuclei staining. Data are shown as means + SD (N = 1, n = 5).

Abbreviations: PHC, primary human hepatoma cell; CK, Cytokeratin;  $\alpha$ -SMA, Alpha-smooth muscle actin; TE-7, Anti-fibroblast antibody clone TE-7

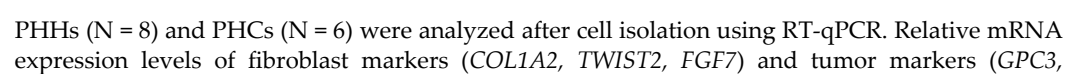

*SPINK1*, *SPP1*, *KPNA2*) were determined. Fi301 (N = 3) and HepG2/Huh7 (N = 6) cells were used as positive controls. Values are means + SD, n = 3, two-way ANOVA and post hoc Šidák correction or Tukey's test, statistical analyses were conducted on  $\Delta$ CT values, \*  $p \leq 0.05$ , \*\*  $p \leq 0.01$ , \*\*\*  $p \leq 0.001$ , \*\*\*\*  $p < 0.0001$ . Abbreviations: PHC, primary human hepatoma cell; PHH, primary human hepatocyte; *COL1A2*, collagen type I alpha 2 Chain; *TWIST2*, twist Family BHLH transcription factor 2; *FGF7*, fibroblast growth factor 7; *GPC3*, glypican-3; *SPINK1*, serine protease inhibitor Kazal-type 1; *SPP1*, secreted phosphoprotein-1; *KPNA2*, karyopherin subunit alpha 2

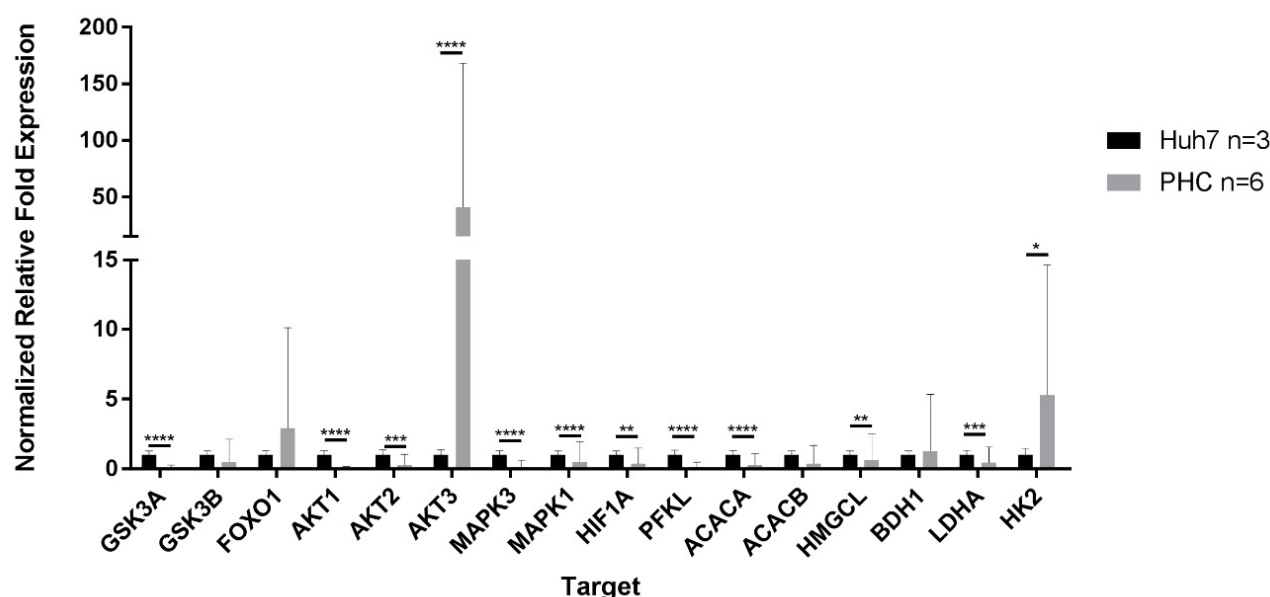

**Figure S3.** Differentially expressed energy metabolism genes of hepatocellular carcinoma and hepatoma cells.

Cells were cultured for 20 h or snap frozen directly after isolation and relative mRNA expression levels of central actors in hepatocyte metabolism were determined by RT-qPCR. PHCs (N = 6) showed different gene expression patterns in comparison to Huh7 cells (N = 3). Data are shown as means + SD, n = 3, two-way ANOVA and post hoc Šidák correction, statistical analyses were conducted on  $\Delta$ CT values, \*  $p \leq 0.05$ , \*\*  $p \leq 0.01$ , \*\*\*  $p \leq 0.001$ , \*\*\*\*  $p < 0.0001$ .

Abbreviations: PHH, primary human hepatocyte; PHC, primary human hepatoma cell; HCC, hepatocellular carcinoma; *GSK3A*, glycogen synthase kinase 3 alpha; *GSK3B*, glycogen synthase kinase 3 beta; *FOXO1*, forkhead box O1; *AKT1*, AKT serine/threonine kinase 1; *AKT2*, AKT serine/threonine kinase 2; *AKT3*, AKT serine/threonine kinase 3; *MAPK3*, mitogen-activated protein kinase 3; *MAPK1*, mitogen-activated protein kinase 1; *HIF1A*, hypoxia inducible factor 1 alpha; *PFKL*, phosphofructokinase liver type; *ACACA*, acetyl-CoA carboxylase alpha; *ACACB*, acetyl-CoA carboxylase beta; *HMGCL*, 3-hydroxymethyl-3-methylglutaryl-CoA lyase; *BDH1*, 3-hydroxybutyrate dehydrogenase 1; *LDHA*, lactate dehydrogenase A; *HK2*, hexokinase 2

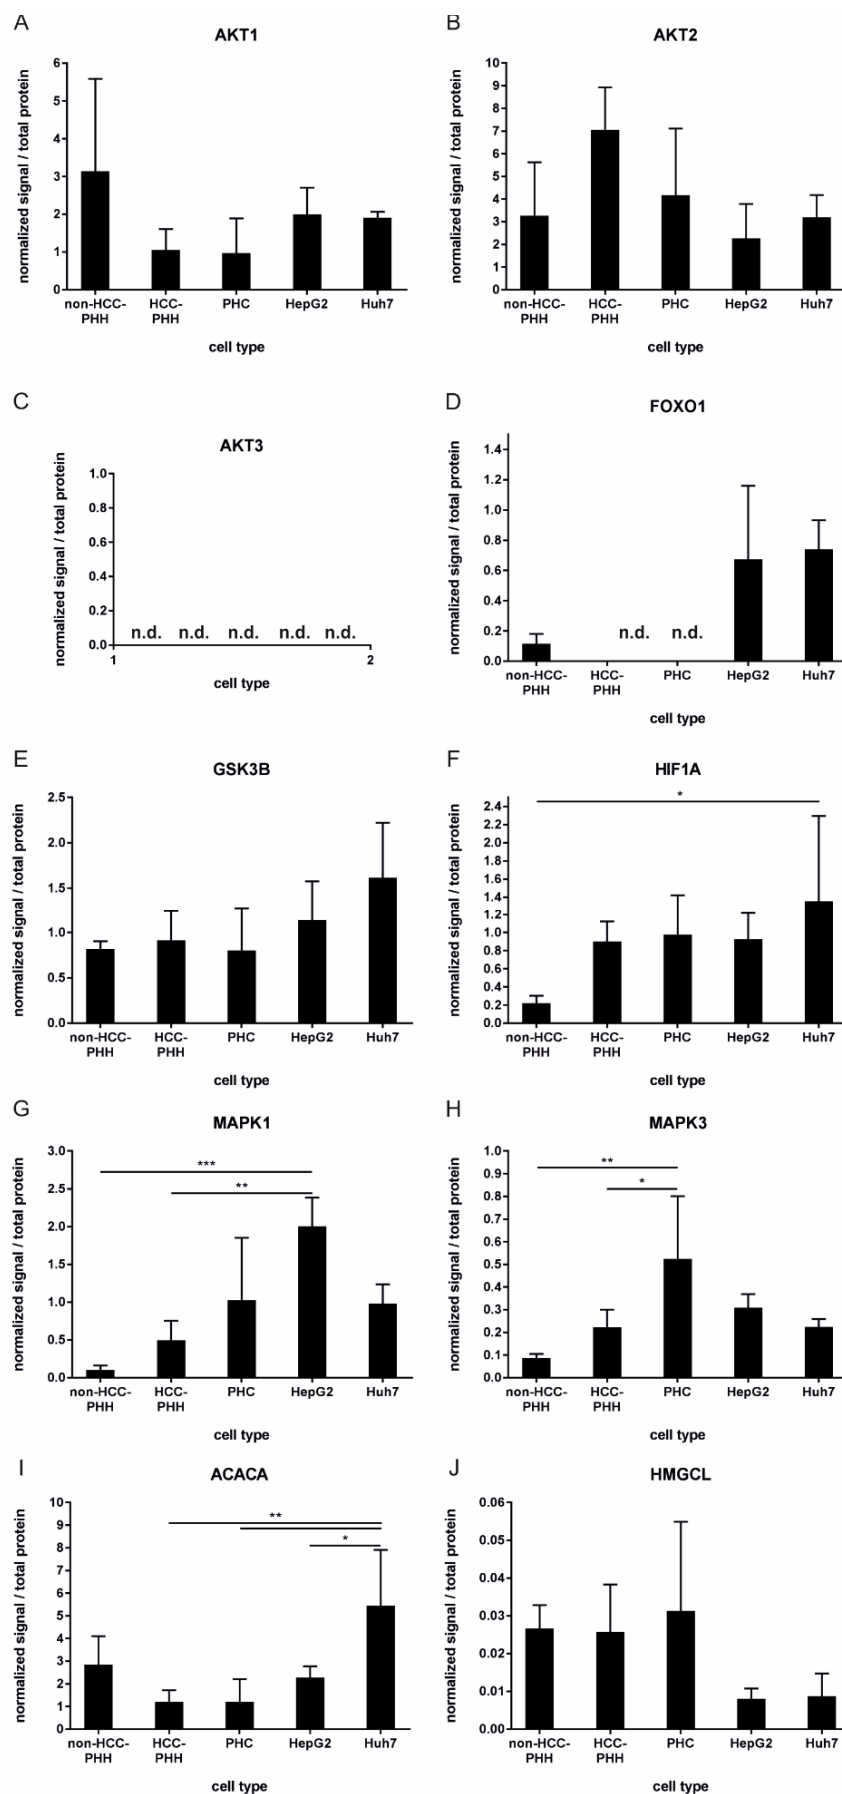

Figure S4. Quantitative evaluation of metabolic target proteins.

Cells were cultured for 20 h or snap frozen directly after isolation and protein expression levels of metabolic targets were determined by Western blotting analysis. (A–J) Healthy hepatocytes (PHH non-HCC, N = 4), PHHs from HCC diagnosed patients (N = 5) and their corresponding PHCs (N = 6) were compared with hepatoma cell lines HepG2 and Huh7 (N = 3) for their characteristic protein expression of different metabolic pathways. Data are shown as means + SD and were normalized on total protein amount, n = 1–2, one-way ANOVA and post hoc Tukey's test, \*  $p \leq 0.05$ , \*\*  $p \leq 0.01$ , \*\*\*  $p \leq 0.001$ , \*\*\*\*  $p < 0.0001$ . Abbreviations: n.d., not determined; PHH, primary human hepatocyte; PHC, primary human hepatoma cell; HCC, hepatocellular carcinoma; GSK3B, glycogen synthase kinase 3 beta; FOXO1, forkhead box O1; AKT1, AKT serine/threonine kinase 1; AKT2, AKT serine/threonine kinase 2; AKT3, AKT serine/threonine kinase 3; MAPK3, mitogen-activated protein kinase 3; MAPK1, mitogen-activated protein kinase 1; HIF1A, hypoxia inducible factor 1 alpha; ACACA, acetyl-CoA carboxylase alpha; HMGCL, 3-hydroxymethyl-3-methylglutaryl-CoA lyase

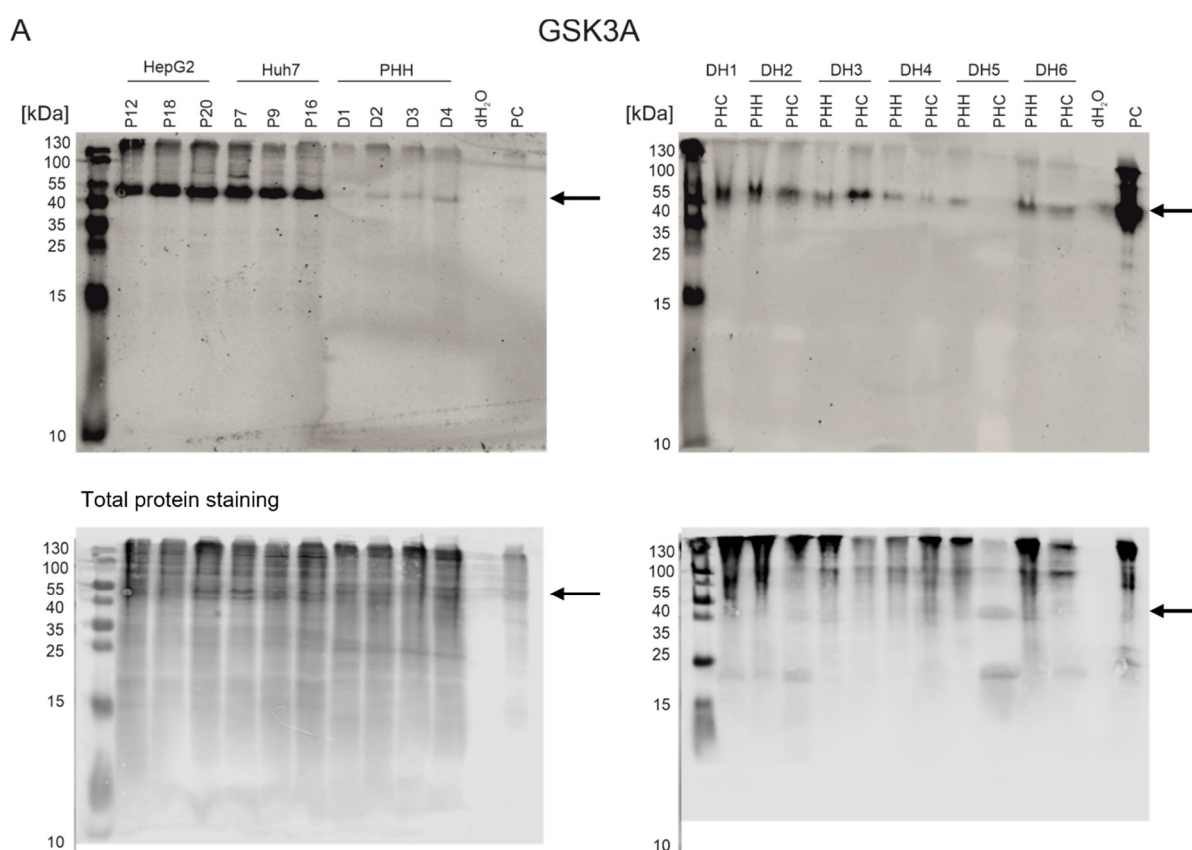



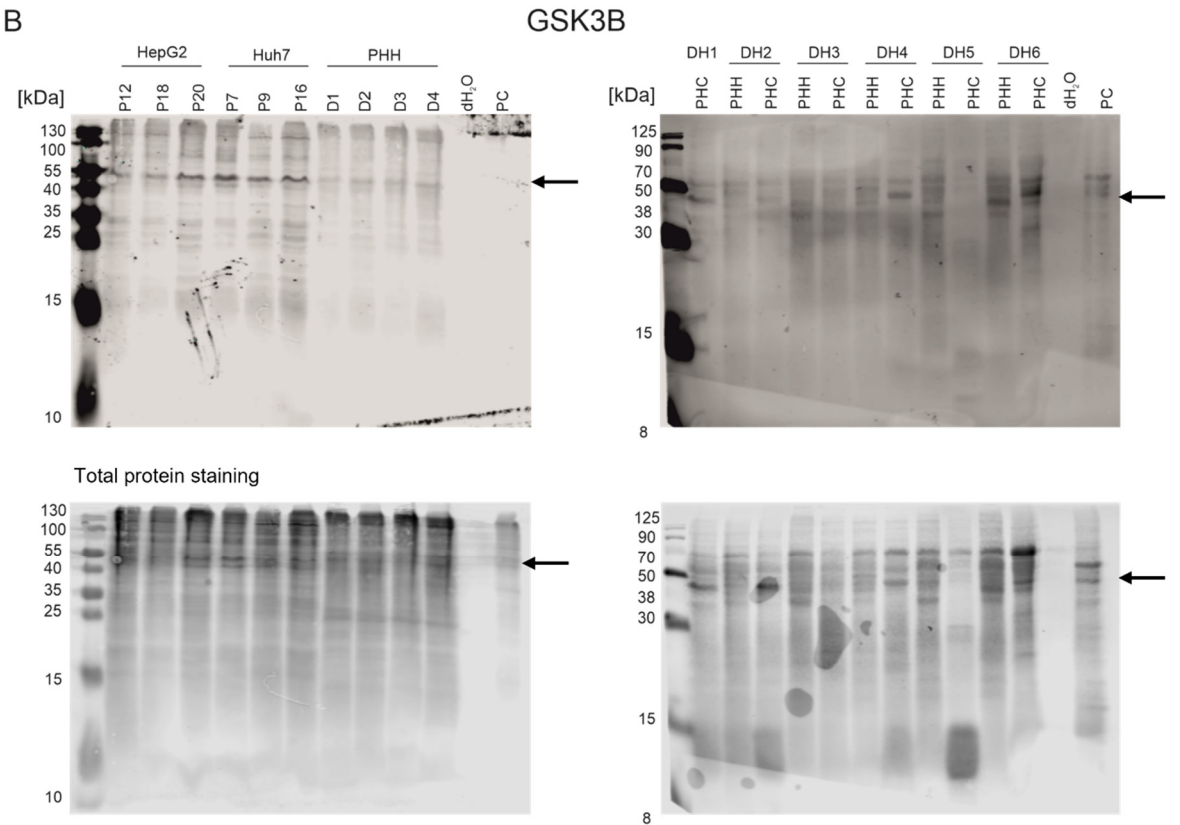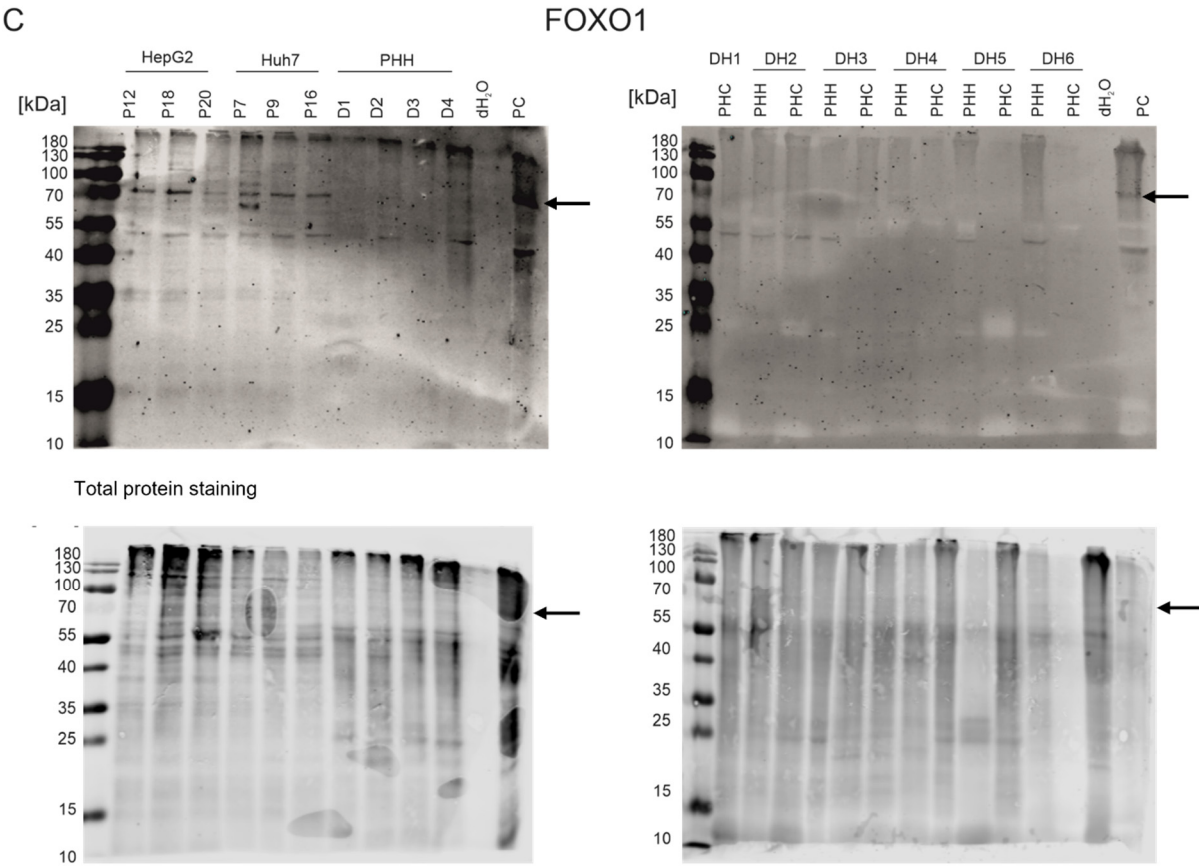



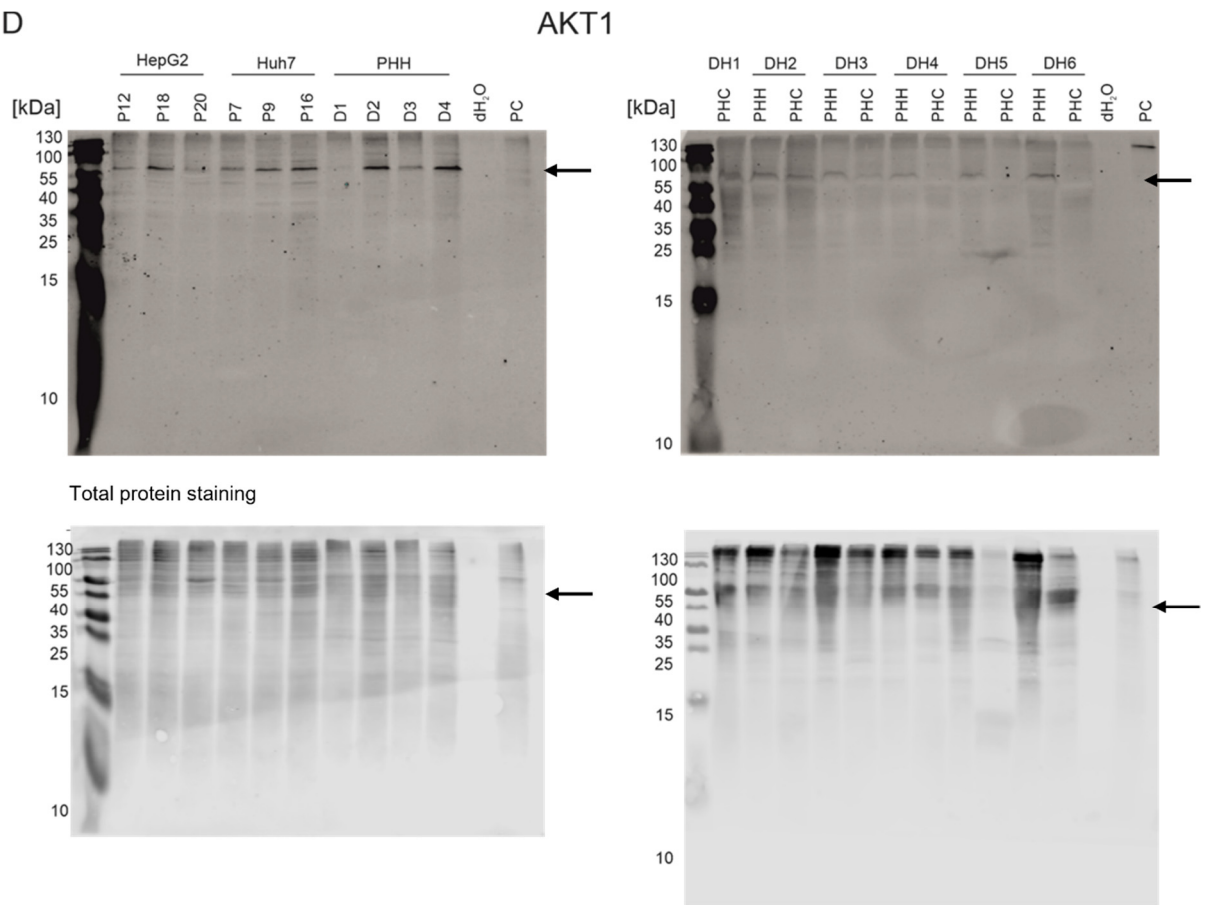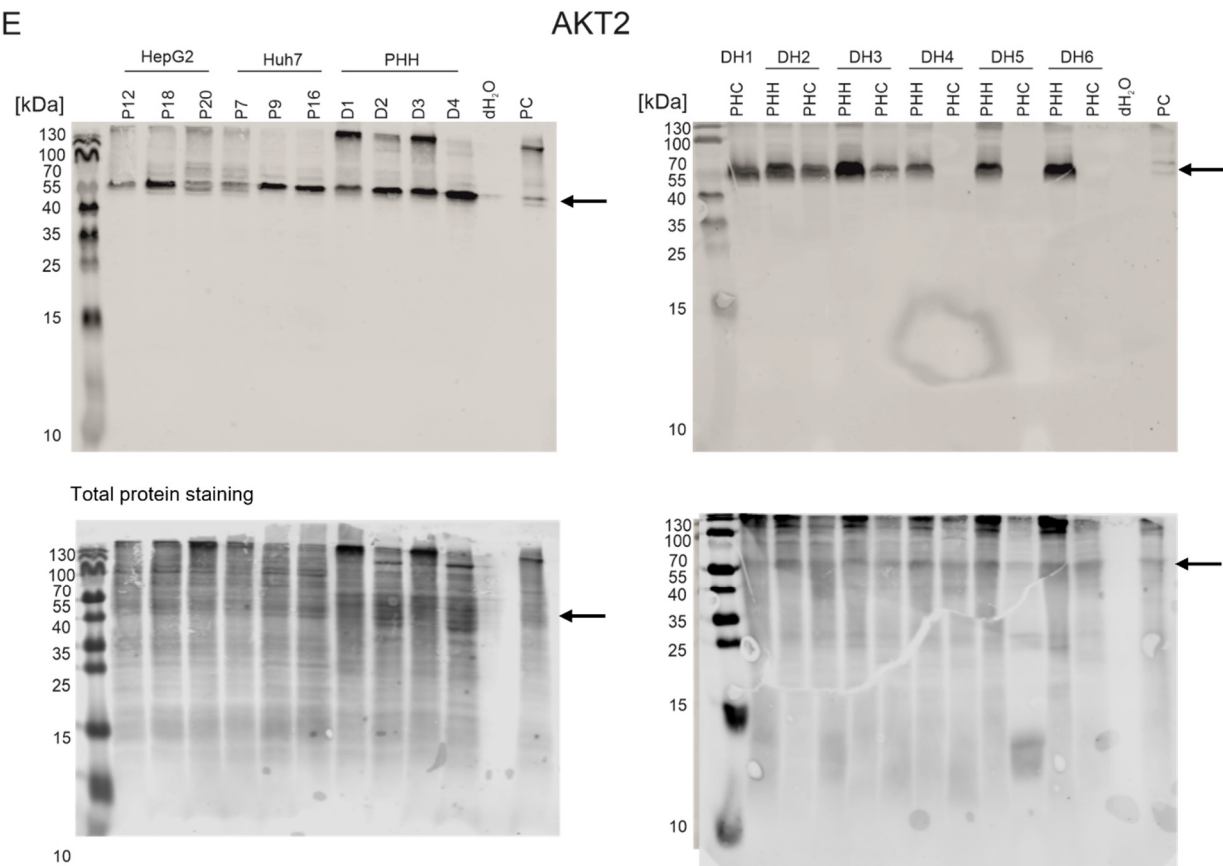

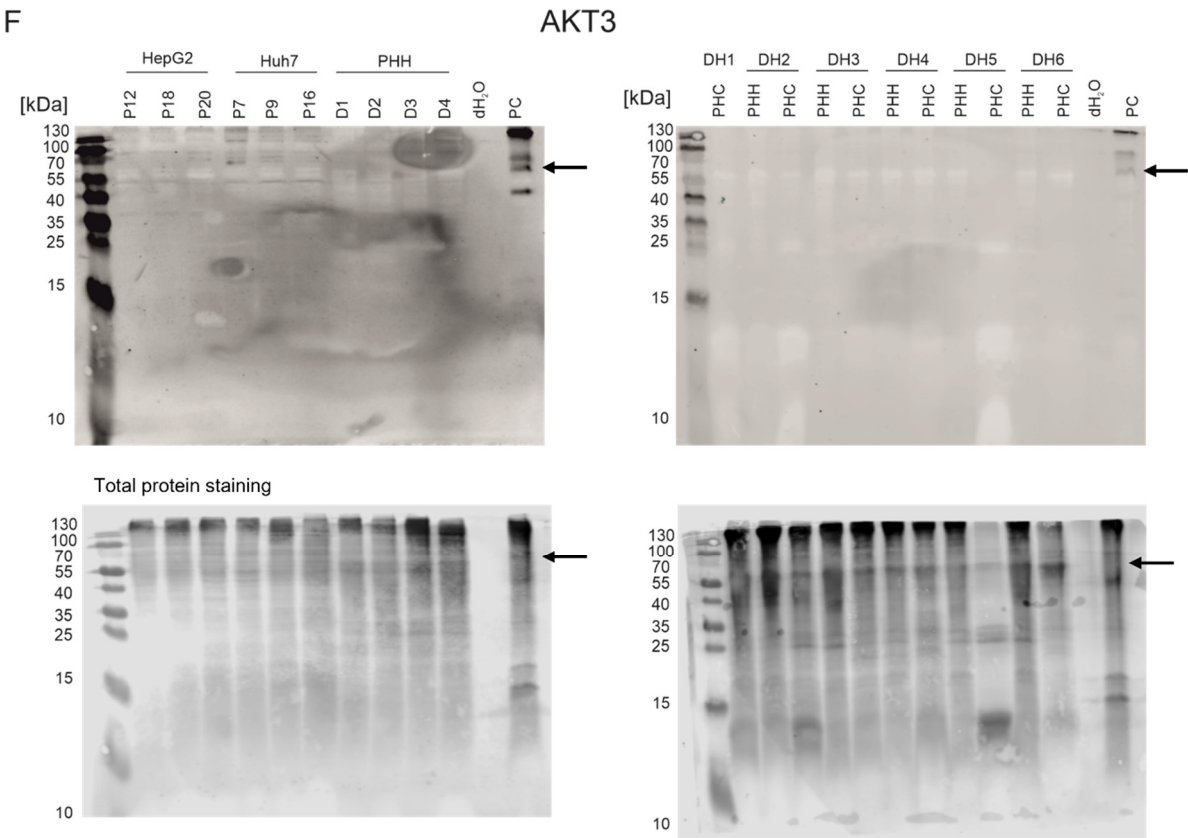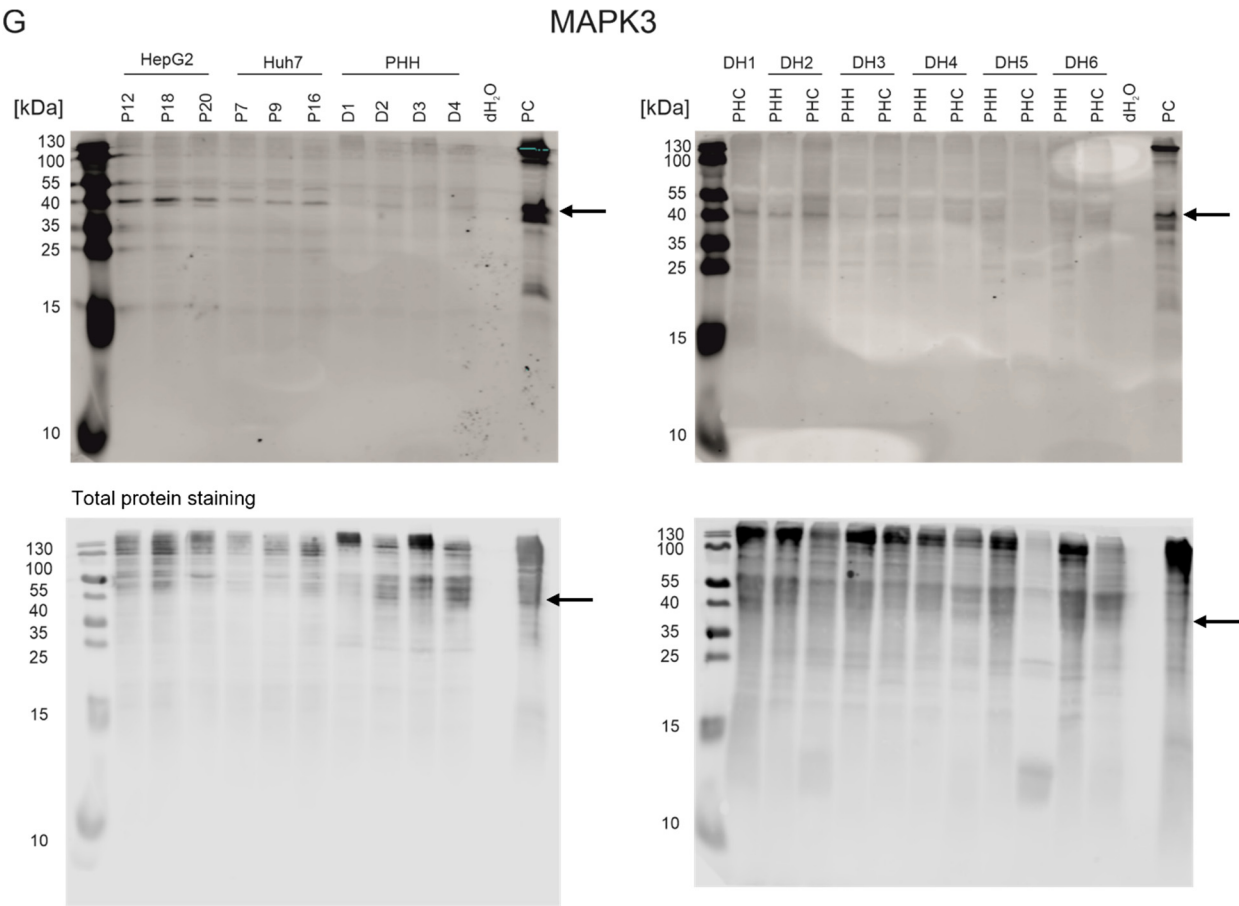

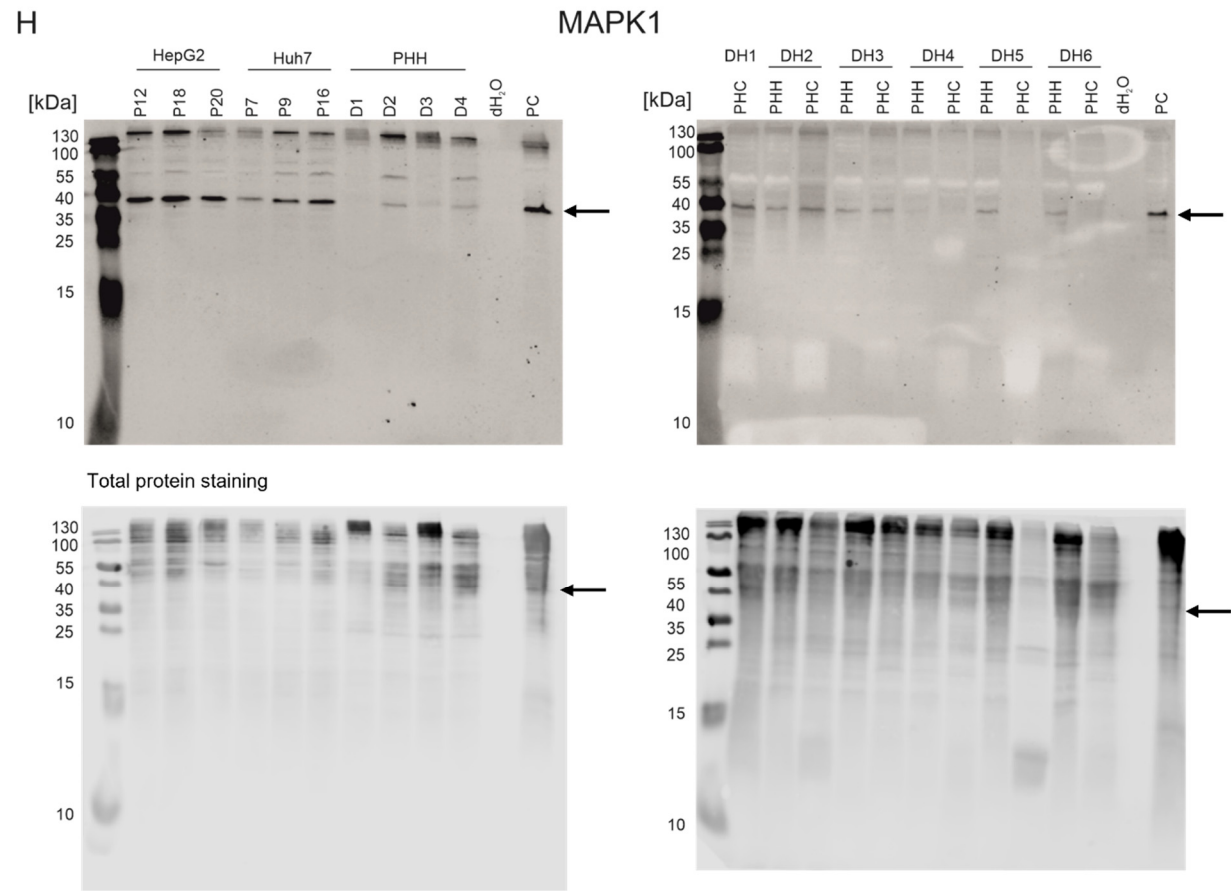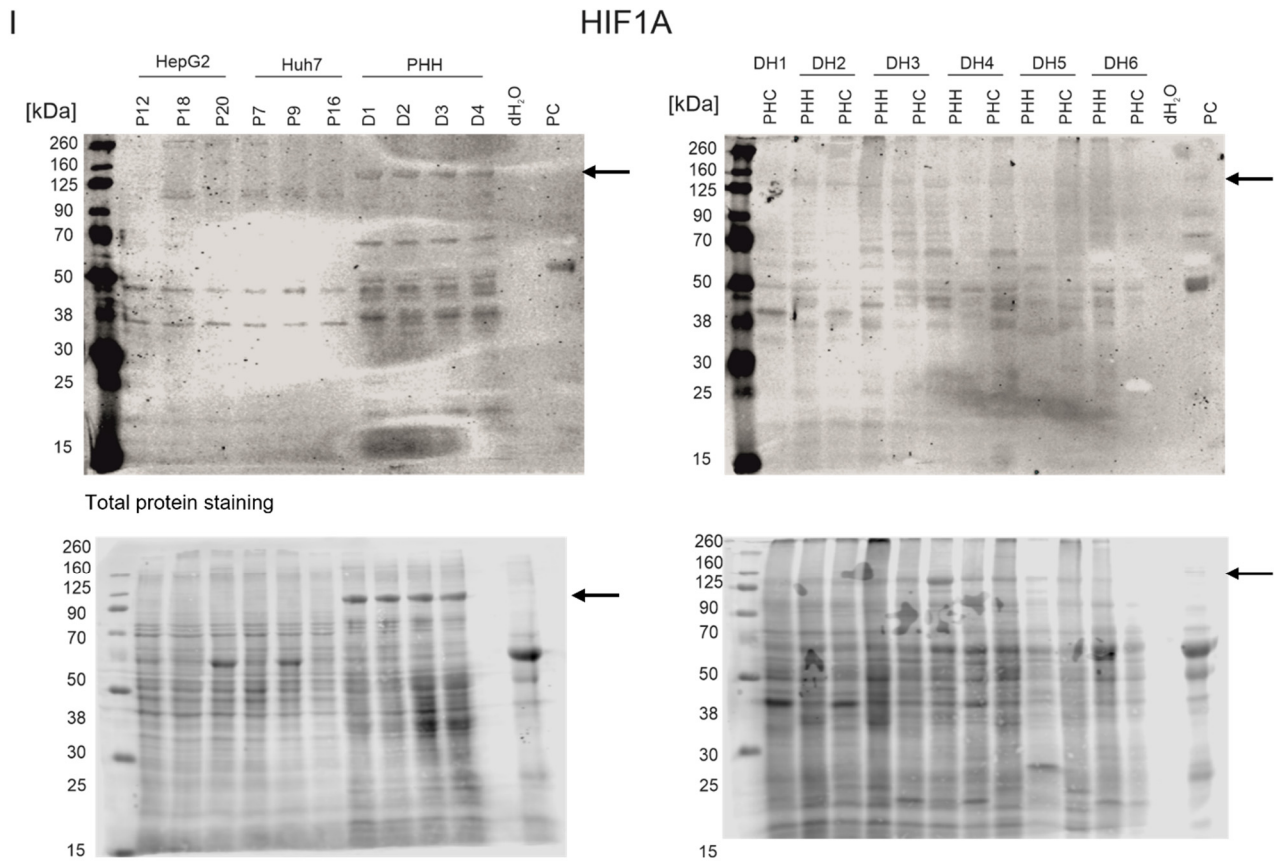

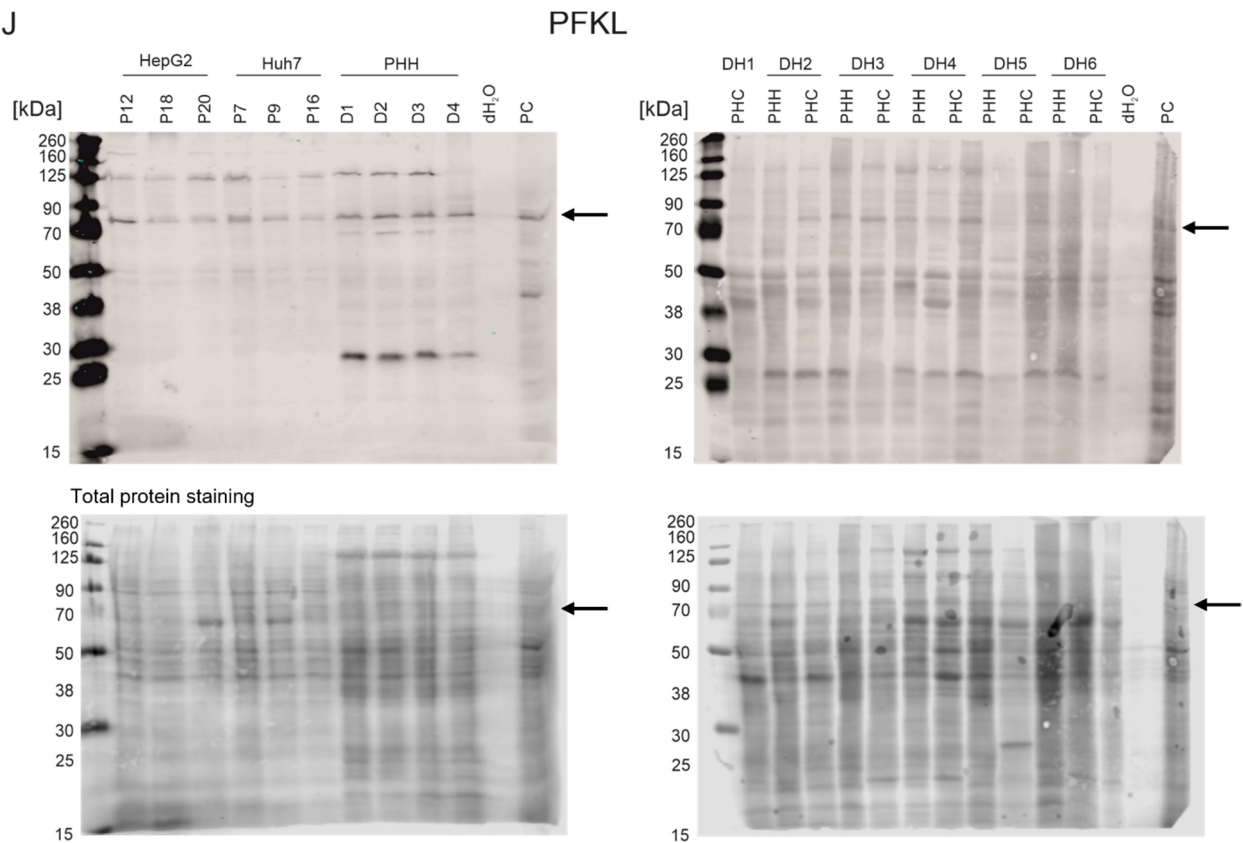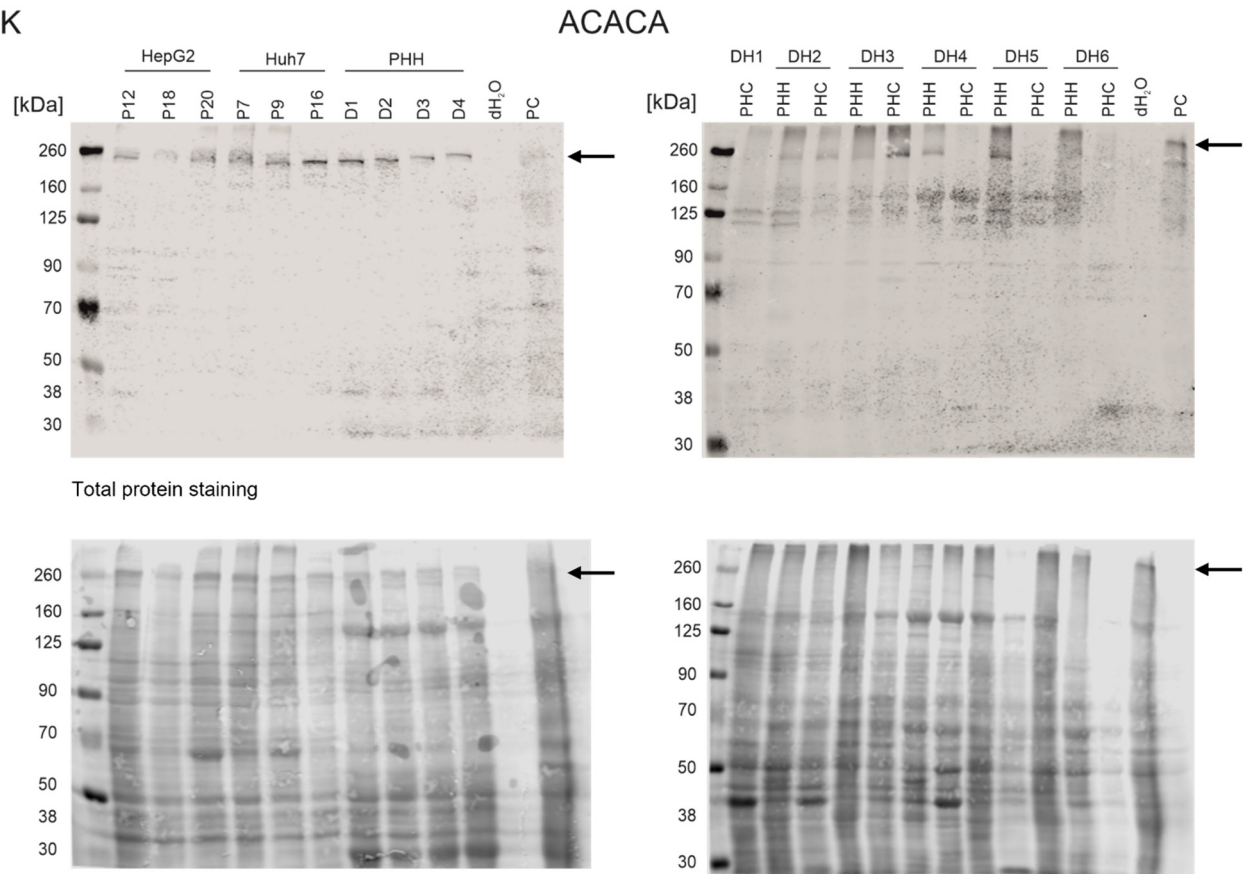



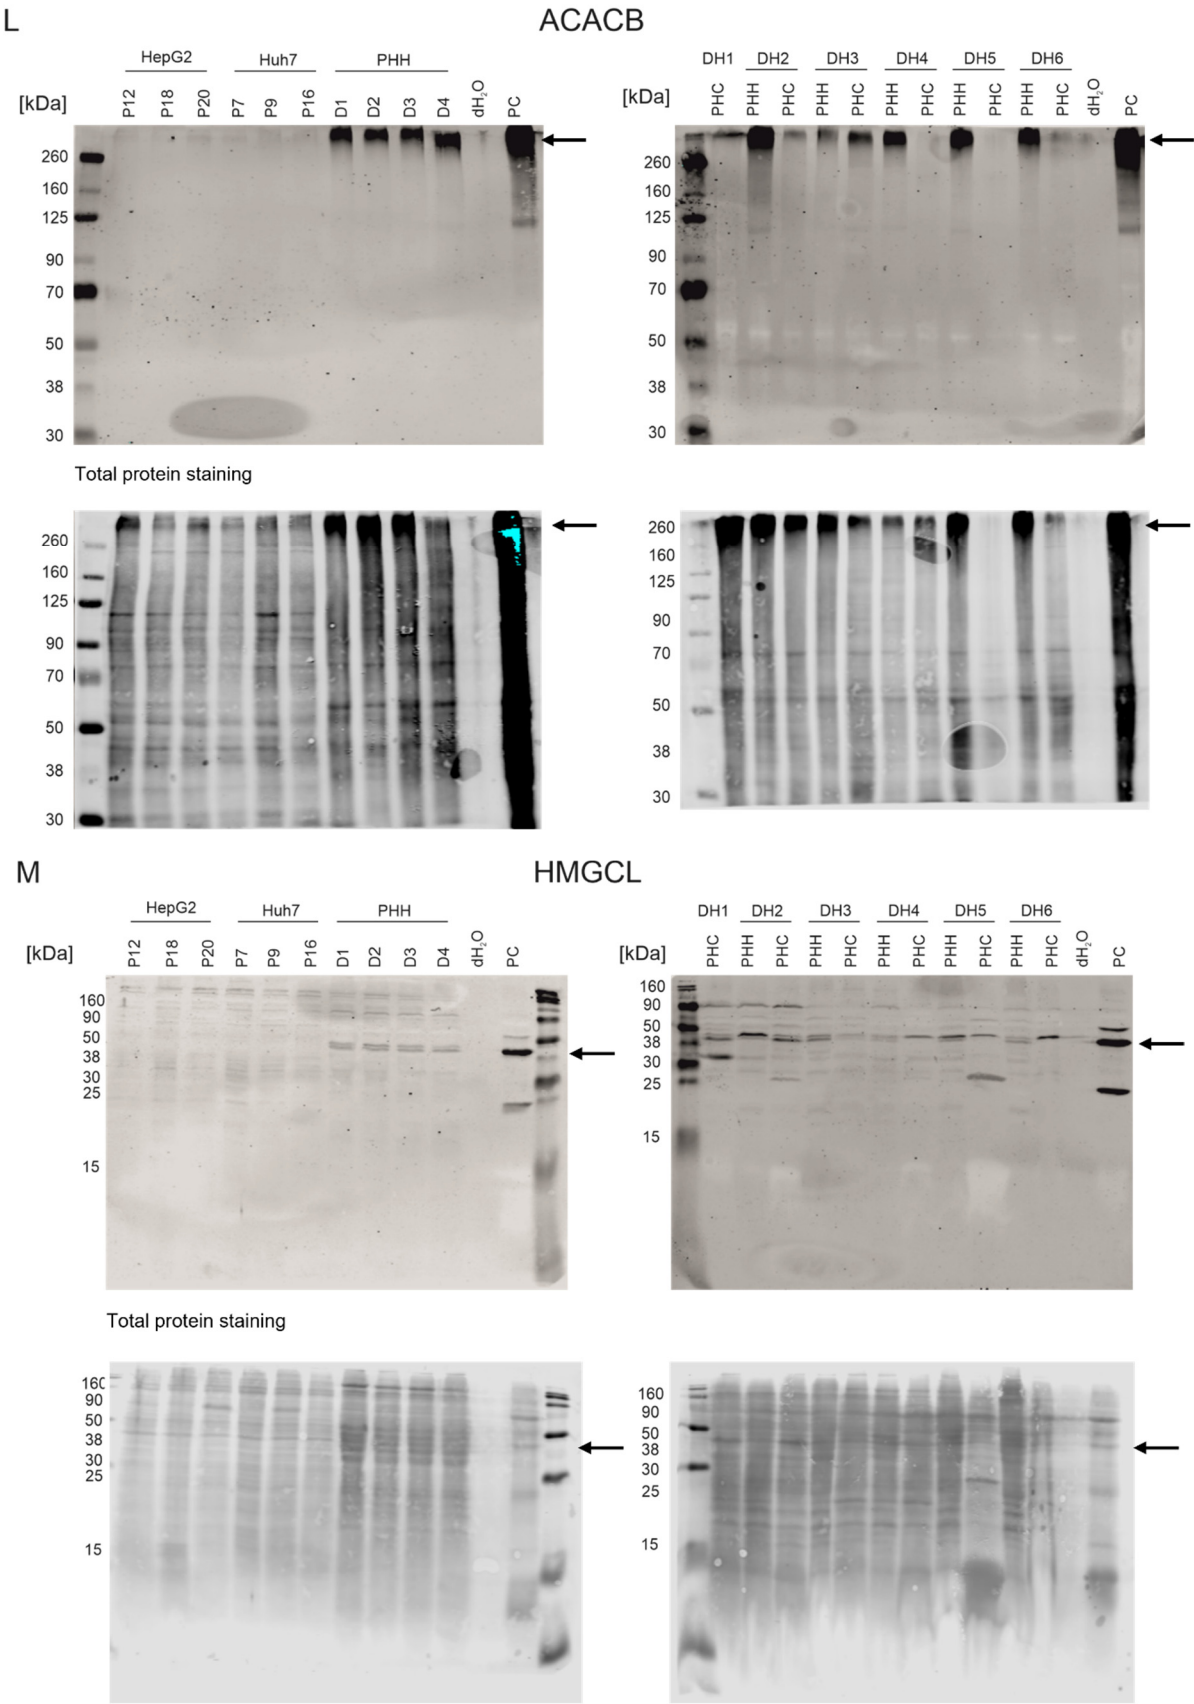

N

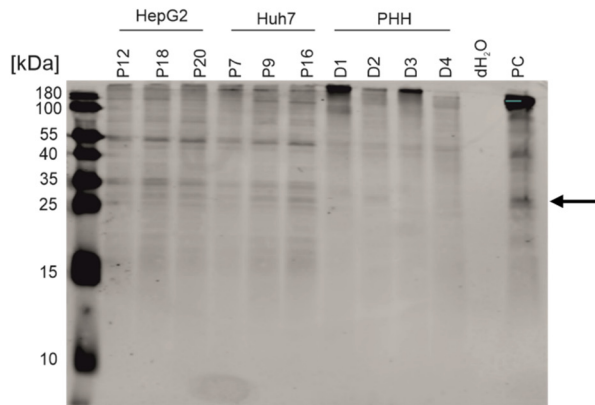

Total protein staining

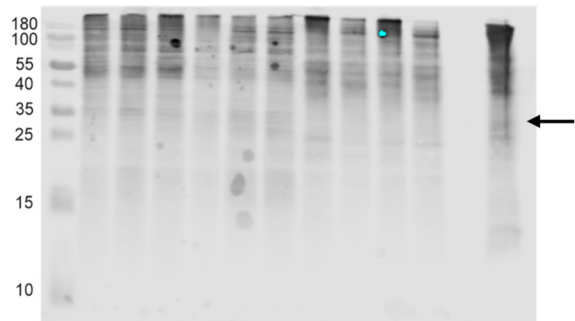

BDH1

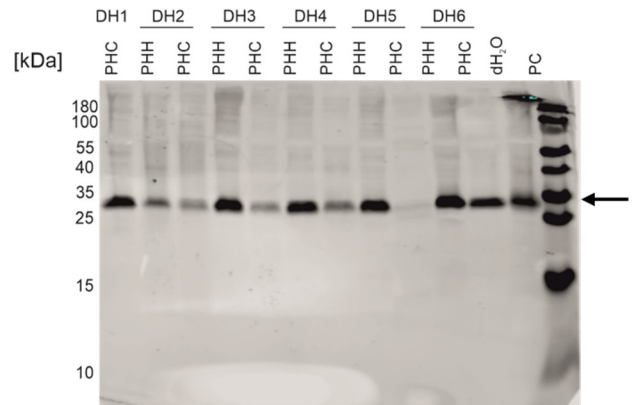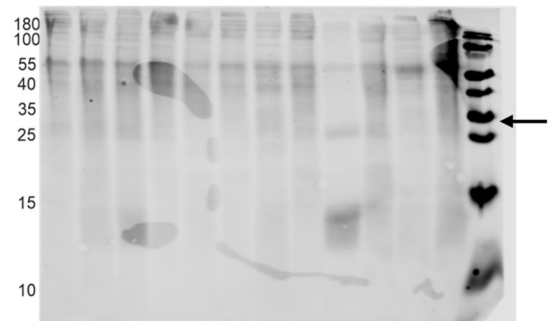

O

LDHA

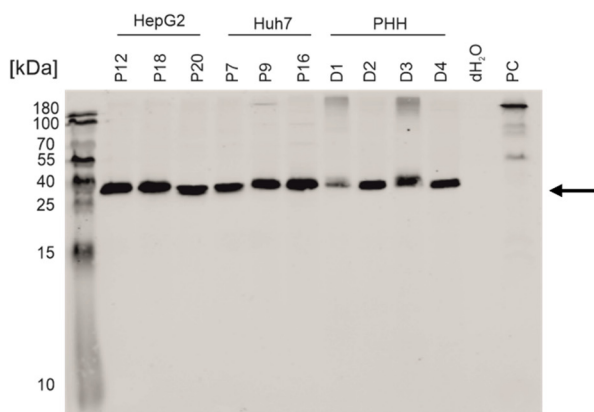

Total protein staining

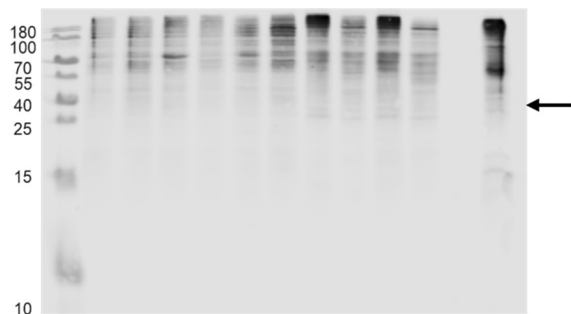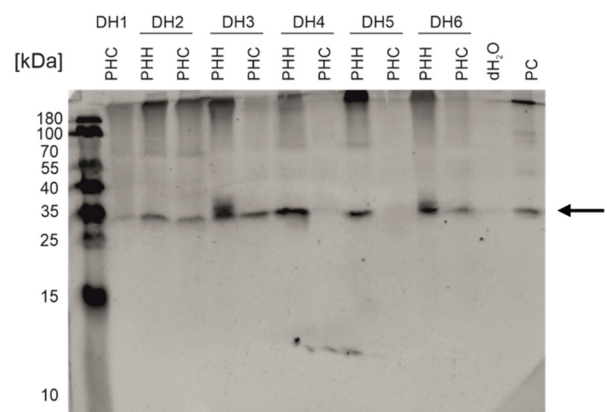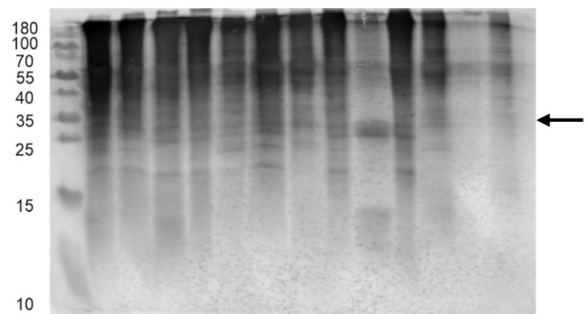

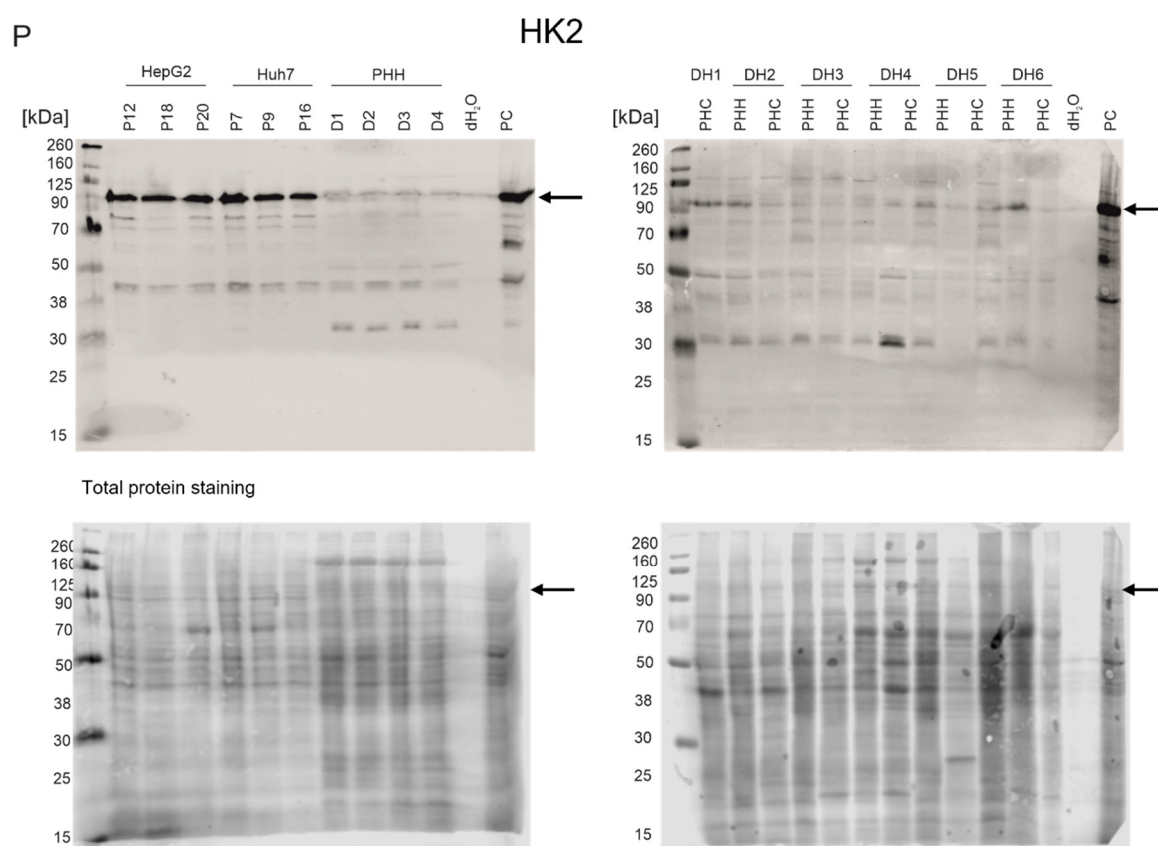

**Figure S5.** Western Blots of analyzed proteins.

Proteins were separated using SDS-PAGE on gels (8 - 15 %) and transferred to nitrocellulose membranes via tank blot system. Membranes were stained with primary antibodies overnight. For detection, fluorescence coupled secondary antibodies were used and incubated for 1 h. Membranes were dried and proteins were quantified using Odyssey 9120 Imaging System.

Abbreviations: PHH, primary human hepatocyte; PHC, primary human hepatoma cell; HCC, hepatocellular carcinoma; GSK3A, glycogen synthase kinase 3 alpha; GSK3B, glycogen synthase kinase 3 beta; FOXO1, forkhead box O1; AKT1, AKT serine/threonine kinase 1; AKT2, AKT serine/threonine kinase 2; AKT3, AKT serine/threonine kinase 3; MAPK3, mitogen-activated protein kinase 3; MAPK1, mitogen-activated protein kinase 1; HIF1A, hypoxia inducible factor 1 alpha; PFKL, phosphofructokinase liver type; ACACA, acetyl-CoA carboxylase alpha; ACACB, acetyl-CoA carboxylase beta; HMGCL, 3-hydroxymethyl-3-methylglutaryl-CoA lyase; BDH1, 3-hydroxybutyrate dehydrogenase 1; LDHA, lactate dehydrogenase A; HK2, hexokinase 2



**Table S5.** Values of test statistics of fibroblast marker (Figure 2A). P values of 0.05 or less were considered significant (\*\* $p \leq 0.001$ , \*\*\*\*  $p < 0.0001$ ).

|                                   |                           |                       |                           |             |                  |    |       |     |
|-----------------------------------|---------------------------|-----------------------|---------------------------|-------------|------------------|----|-------|-----|
| Number of families                | 3                         |                       |                           |             |                  |    |       |     |
| Number of comparisons per family  | 3                         |                       |                           |             |                  |    |       |     |
| Alpha                             | 0,05                      |                       |                           |             |                  |    |       |     |
|                                   |                           |                       |                           |             |                  |    |       |     |
| Tukey's multiple comparisons test | Predicted (LS) mean diff, | 95,00% CI of diff,    | Below threshold?          | Summary     | Adjusted P Value |    |       |     |
|                                   |                           |                       |                           |             |                  |    |       |     |
| Col1A2                            |                           |                       |                           |             |                  |    |       |     |
| Fi301 n=3 vs. PHC n=6             | -5,824                    | -7,752 to -3,897      | Yes                       | ****        | <0,0001          |    |       |     |
| Fi301 n=3 vs. PHH n=8             | -10,51                    | -12,53 to -8,499      | Yes                       | ****        | <0,0001          |    |       |     |
| PHC n=6 vs. PHH n=8               | -4,69                     | -6,461 to -2,920      | Yes                       | ****        | <0,0001          |    |       |     |
|                                   |                           |                       |                           |             |                  |    |       |     |
| TWIST2                            |                           |                       |                           |             |                  |    |       |     |
| Fi301 n=3 vs. PHC n=6             | -4,114                    | -5,980 to -2,248      | Yes                       | ****        | <0,0001          |    |       |     |
| Fi301 n=3 vs. PHH n=8             | -6,478                    | -8,265 to -4,691      | Yes                       | ****        | <0,0001          |    |       |     |
| PHC n=6 vs. PHH n=8               | -2,364                    | -3,789 to -0,9381     | Yes                       | ***         | 0,0004           |    |       |     |
|                                   |                           |                       |                           |             |                  |    |       |     |
| FGF7                              |                           |                       |                           |             |                  |    |       |     |
| Fi301 n=3 vs. PHC n=6             | -7,856                    | -9,722 to -5,989      | Yes                       | ****        | <0,0001          |    |       |     |
| Fi301 n=3 vs. PHH n=8             | -10,24                    | -12,03 to -8,457      | Yes                       | ****        | <0,0001          |    |       |     |
| PHC n=6 vs. PHH n=8               | -2,389                    | -3,814 to -0,9632     | Yes                       | ***         | 0,0003           |    |       |     |
|                                   |                           |                       |                           |             |                  |    |       |     |
|                                   |                           |                       |                           |             |                  |    |       |     |
| Test details                      | Predicted (LS) mean 1     | Predicted (LS) mean 2 | Predicted (LS) mean diff, | SE of diff, | N1               | N2 | q     | DF  |
|                                   |                           |                       |                           |             |                  |    |       |     |
| Col1A2                            |                           |                       |                           |             |                  |    |       |     |
| Fi301 n=3 vs. PHC n=6             | 3,249                     | 9,073                 | -5,824                    | 0,813       | 9                | 15 | 10,13 | 129 |
| Fi301 n=3 vs. PHH n=8             | 3,249                     | 13,76                 | -10,51                    | 0,8502      | 9                | 12 | 17,49 | 129 |
| PHC n=6 vs. PHH n=8               | 9,073                     | 13,76                 | -4,69                     | 0,7468      | 15               | 12 | 8,882 | 129 |
|                                   |                           |                       |                           |             |                  |    |       |     |
| TWIST2                            |                           |                       |                           |             |                  |    |       |     |
| Fi301 n=3 vs. PHC n=6             | 6,364                     | 10,48                 | -4,114                    | 0,7872      | 9                | 18 | 7,391 | 129 |
| Fi301 n=3 vs. PHH n=8             | 6,364                     | 12,84                 | -6,478                    | 0,7537      | 9                | 24 | 12,15 | 129 |
| PHC n=6 vs. PHH n=8               | 10,48                     | 12,84                 | -2,364                    | 0,6012      | 18               | 24 | 5,56  | 129 |
|                                   |                           |                       |                           |             |                  |    |       |     |
| FGF7                              |                           |                       |                           |             |                  |    |       |     |
| Fi301 n=3 vs. PHC n=6             | 2,873                     | 10,73                 | -7,856                    | 0,7872      | 9                | 18 | 14,11 | 129 |
| Fi301 n=3 vs. PHH n=8             | 2,873                     | 13,12                 | -10,24                    | 0,7537      | 9                | 24 | 19,22 | 129 |
| PHC n=6 vs. PHH n=8               | 10,73                     | 13,12                 | -2,389                    | 0,6012      | 18               | 24 | 5,619 | 129 |

**Table S6.** Values of test statistics of tumor marker (Figure 2B). P values of 0.05 or less were considered significant (\*  $p \leq 0.05$ , \*\*  $p \leq 0.01$ , \*\*\*\*  $p < 0.0001$ ).

|                                   |                           |                       |                           |             |                  |    |       |     |
|-----------------------------------|---------------------------|-----------------------|---------------------------|-------------|------------------|----|-------|-----|
| Number of families                | 4                         |                       |                           |             |                  |    |       |     |
| Number of comparisons per family  | 3                         |                       |                           |             |                  |    |       |     |
| Alpha                             | 0,05                      |                       |                           |             |                  |    |       |     |
|                                   |                           |                       |                           |             |                  |    |       |     |
| Tukey's multiple comparisons test | Predicted (LS) mean diff, | 95,00% CI of diff,    | Below threshold?          | Summary     | Adjusted P Value |    |       |     |
|                                   |                           |                       |                           |             |                  |    |       |     |
| GPC3                              |                           |                       |                           |             |                  |    |       |     |
| HepG2/Huh7 n=6 vs. PHC n=6        | -4,514                    | -6,050 to -2,978      | Yes                       | ****        | <0,0001          |    |       |     |
| HepG2/Huh7 n=6 vs. PHH n=8        | -9,165                    | -10,60 to -7,728      | Yes                       | ****        | <0,0001          |    |       |     |
| PHC n=6 vs. PHH n=8               | -4,651                    | -6,088 to -3,214      | Yes                       | ****        | <0,0001          |    |       |     |
|                                   |                           |                       |                           |             |                  |    |       |     |
| SPINK1                            |                           |                       |                           |             |                  |    |       |     |
| HepG2/Huh7 n=6 vs. PHC n=6        | -3,737                    | -5,273 to -2,201      | Yes                       | ****        | <0,0001          |    |       |     |
| HepG2/Huh7 n=6 vs. PHH n=8        | -2,203                    | -3,640 to -0,7660     | Yes                       | **          | 0,0011           |    |       |     |
| PHC n=6 vs. PHH n=8               | 1,534                     | 0,09686 to 2,971      | Yes                       | *           | 0,0333           |    |       |     |
|                                   |                           |                       |                           |             |                  |    |       |     |
| SPP1                              |                           |                       |                           |             |                  |    |       |     |
| HepG2/Huh7 n=6 vs. PHC n=6        | 3,07                      | 1,534 to 4,606        | Yes                       | ****        | <0,0001          |    |       |     |
| HepG2/Huh7 n=6 vs. PHH n=8        | -1,213                    | -2,650 to 0,2237      | No                        | ns          | 0,1165           |    |       |     |
| PHC n=6 vs. PHH n=8               | -4,283                    | -5,720 to -2,846      | Yes                       | ****        | <0,0001          |    |       |     |
|                                   |                           |                       |                           |             |                  |    |       |     |
| KPNA2                             |                           |                       |                           |             |                  |    |       |     |
| HepG2/Huh7 n=6 vs. PHC n=6        | -1,955                    | -3,491 to -0,4191     | Yes                       | **          | 0,0083           |    |       |     |
| HepG2/Huh7 n=6 vs. PHH n=8        | -3,976                    | -5,413 to -2,540      | Yes                       | ****        | <0,0001          |    |       |     |
| PHC n=6 vs. PHH n=8               | -2,021                    | -3,458 to -0,5843     | Yes                       | **          | 0,003            |    |       |     |
|                                   |                           |                       |                           |             |                  |    |       |     |
|                                   |                           |                       |                           |             |                  |    |       |     |
| Test details                      | Predicted (LS) mean 1     | Predicted (LS) mean 2 | Predicted (LS) mean diff, | SE of diff, | N1               | N2 | q     | DF  |
|                                   |                           |                       |                           |             |                  |    |       |     |
| GPC3                              |                           |                       |                           |             |                  |    |       |     |
| HepG2/Huh7 n=6 vs. PHC n=6        | -1,084                    | 3,43                  | -4,514                    | 0,6511      | 18               | 18 | 9,804 | 228 |
| HepG2/Huh7 n=6 vs. PHH n=8        | -1,084                    | 8,081                 | -9,165                    | 0,6091      | 18               | 24 | 21,28 | 228 |
| PHC n=6 vs. PHH n=8               | 3,43                      | 8,081                 | -4,651                    | 0,6091      | 18               | 24 | 10,8  | 228 |
|                                   |                           |                       |                           |             |                  |    |       |     |
| SPINK1                            |                           |                       |                           |             |                  |    |       |     |
| HepG2/Huh7 n=6 vs. PHC n=6        | 4,265                     | 8,002                 | -3,737                    | 0,6511      | 18               | 18 | 8,116 | 228 |
| HepG2/Huh7 n=6 vs. PHH n=8        | 4,265                     | 6,468                 | -2,203                    | 0,6091      | 18               | 24 | 5,115 | 228 |
| PHC n=6 vs. PHH n=8               | 8,002                     | 6,468                 | 1,534                     | 0,6091      | 18               | 24 | 3,561 | 228 |
|                                   |                           |                       |                           |             |                  |    |       |     |
| SPP1                              |                           |                       |                           |             |                  |    |       |     |
| HepG2/Huh7 n=6 vs. PHC n=6        | 4,014                     | 0,9434                | 3,07                      | 0,6511      | 18               | 18 | 6,668 | 228 |
| HepG2/Huh7 n=6 vs. PHH n=8        | 4,014                     | 5,227                 | -1,213                    | 0,6091      | 18               | 24 | 2,817 | 228 |
| PHC n=6 vs. PHH n=8               | 0,9434                    | 5,227                 | -4,283                    | 0,6091      | 18               | 24 | 9,945 | 228 |
|                                   |                           |                       |                           |             |                  |    |       |     |
| KPNA2                             |                           |                       |                           |             |                  |    |       |     |
| HepG2/Huh7 n=6 vs. PHC n=6        | 4,436                     | 6,391                 | -1,955                    | 0,6511      | 18               | 18 | 4,247 | 228 |
| HepG2/Huh7 n=6 vs. PHH n=8        | 4,436                     | 8,412                 | -3,976                    | 0,6091      | 18               | 24 | 9,233 | 228 |
| PHC n=6 vs. PHH n=8               | 6,391                     | 8,412                 | -2,021                    | 0,6091      | 18               | 24 | 4,693 | 228 |

**Table S7.** Values of test statistics of RT-qPCR analyses of non-HCC-PHHs and HCC-PHHs (Figure 3A). P values of 0.05 or less were considered significant (\*  $p \leq 0.05$ , \*\*  $p \leq 0.01$ , \*\*\*  $p \leq 0.001$ , \*\*\*\*  $p < 0.0001$ ).

|                                   |            |                    |              |             |                  |    |       |     |
|-----------------------------------|------------|--------------------|--------------|-------------|------------------|----|-------|-----|
| Number of families                | 1          |                    |              |             |                  |    |       |     |
| Number of comparisons per family  | 16         |                    |              |             |                  |    |       |     |
| Alpha                             | 0,05       |                    |              |             |                  |    |       |     |
|                                   |            |                    |              |             |                  |    |       |     |
| Sidak's multiple comparisons test | Mean Diff, | 95,00% CI of diff, | Significant? | Summary     | Adjusted P Value |    |       |     |
|                                   |            |                    |              |             |                  |    |       |     |
| PHH healthy n=4 - PHH HCC n=9     |            |                    |              |             |                  |    |       |     |
| GSK3A                             | -1,987     | -3,222 to -0,7516  | Yes          | ****        | <0,0001          |    |       |     |
| GSK3B                             | 0,7716     | -0,4565 to 2       | No           | ns          | 0,6495           |    |       |     |
| FOXO1                             | 3,498      | 2,27 to 4,726      | Yes          | ****        | <0,0001          |    |       |     |
| AKT1                              | -2,987     | -4,253 to -1,721   | Yes          | ****        | <0,0001          |    |       |     |
| AKT2                              | -1,401     | -2,629 to -0,1731  | Yes          | *           | 0,0124           |    |       |     |
| AKT3                              | 1,178      | -0,05688 to 2,414  | No           | ns          | 0,0757           |    |       |     |
| MAPK3                             | -1,878     | -3,106 to -0,6502  | Yes          | ***         | 0,0001           |    |       |     |
| MAPK1                             | -0,8239    | -2,052 to 0,4042   | No           | ns          | 0,5412           |    |       |     |
| HIF1A                             | 1,403      | 0,1751 to 2,631    | Yes          | *           | 0,0122           |    |       |     |
| PFKL                              | -1,619     | -2,848 to -0,3913  | Yes          | **          | 0,0017           |    |       |     |
| ACACA                             | -0,529     | -1,78 to 0,7225    | No           | ns          | 0,9776           |    |       |     |
| ACACB                             | -0,9131    | -2,141 to 0,3149   | No           | ns          | 0,3666           |    |       |     |
| HMGCL                             | -1,377     | -2,605 to -0,1485  | Yes          | *           | 0,0153           |    |       |     |
| BDH1                              | 2,294      | 1,066 to 3,522     | Yes          | ****        | <0,0001          |    |       |     |
| LDHA                              | -0,4486    | -1,677 to 0,7795   | No           | ns          | 0,9948           |    |       |     |
| HK2                               | 7,024      | 5,796 to 8,252     | Yes          | ****        | <0,0001          |    |       |     |
|                                   |            |                    |              |             |                  |    |       |     |
|                                   |            |                    |              |             |                  |    |       |     |
| Test details                      | Mean 1     | Mean 2             | Mean Diff,   | SE of diff, | N1               | N2 | t     | DF  |
|                                   |            |                    |              |             |                  |    |       |     |
| PHH healthy n=4 - PHH HCC n=9     |            |                    |              |             |                  |    |       |     |
| GSK3A                             | 7,382      | 9,369              | -1,987       | 0,4173      | 12               | 26 | 4,761 | 586 |
| GSK3B                             | 8,824      | 8,052              | 0,7716       | 0,4149      | 12               | 27 | 1,86  | 586 |
| FOXO1                             | 9,051      | 5,553              | 3,498        | 0,4149      | 12               | 27 | 8,431 | 586 |
| AKT1                              | 5,048      | 8,035              | -2,987       | 0,4277      | 11               | 27 | 6,983 | 586 |
| AKT2                              | 7,294      | 8,695              | -1,401       | 0,4149      | 12               | 27 | 3,377 | 586 |
| AKT3                              | 13,17      | 11,99              | 1,178        | 0,4173      | 12               | 26 | 2,824 | 586 |
| MAPK3                             | 8,891      | 10,77              | -1,878       | 0,4149      | 12               | 27 | 4,527 | 586 |
| MAPK1                             | 7,302      | 8,125              | -0,8239      | 0,4149      | 12               | 27 | 1,986 | 586 |
| HIF1A                             | 8,099      | 6,695              | 1,403        | 0,4149      | 12               | 27 | 3,382 | 586 |
| PFKL                              | 8,172      | 9,791              | -1,619       | 0,4149      | 12               | 27 | 3,903 | 586 |
| ACACA                             | 10,55      | 11,08              | -0,529       | 0,4228      | 12               | 24 | 1,251 | 586 |
| ACACB                             | 7,757      | 8,67               | -0,9131      | 0,4149      | 12               | 27 | 2,201 | 586 |
| HMGCL                             | 5,538      | 6,914              | -1,377       | 0,4149      | 12               | 27 | 3,318 | 586 |
| BDH1                              | 9,571      | 7,277              | 2,294        | 0,4149      | 12               | 27 | 5,53  | 586 |
| LDHA                              | 2,911      | 3,36               | -0,4486      | 0,4149      | 12               | 27 | 1,081 | 586 |
| HK2                               | 17,69      | 10,67              | 7,024        | 0,4149      | 12               | 27 | 16,93 | 586 |

**Table S8.** Values of test statistics of RT-qPCR analyses of HCC-PHHs and HepG2 cells (Figure 3B). P values of 0.05 or less were considered significant (\*  $p \leq 0.05$ , \*\*  $p \leq 0.01$ , \*\*\*\*  $p < 0.0001$ ).

|                                   |            |                    |              |             |                  |    |        |     |
|-----------------------------------|------------|--------------------|--------------|-------------|------------------|----|--------|-----|
| Number of families                | 1          |                    |              |             |                  |    |        |     |
| Number of comparisons per family  | 16         |                    |              |             |                  |    |        |     |
| Alpha                             | 0,05       |                    |              |             |                  |    |        |     |
|                                   |            |                    |              |             |                  |    |        |     |
| Sidak's multiple comparisons test | Mean Diff, | 95,00% CI of diff, | Significant? | Summary     | Adjusted P Value |    |        |     |
|                                   |            |                    |              |             |                  |    |        |     |
| PHH HCC n=9 - HepG2 n=3           |            |                    |              |             |                  |    |        |     |
| GSK3A                             | 4,736      | 3,311 to 6,16      | Yes          | ****        | <0,0001          |    |        |     |
| GSK3B                             | 2,225      | 0,8073 to 3,643    | Yes          | ****        | <0,0001          |    |        |     |
| FOXO1                             | -1,1       | -2,518 to 0,3177   | No           | ns          | 0,2991           |    |        |     |
| AKT1                              | 4,659      | 3,241 to 6,077     | Yes          | ****        | <0,0001          |    |        |     |
| AKT2                              | 2,614      | 1,197 to 4,032     | Yes          | ****        | <0,0001          |    |        |     |
| AKT3                              | -1,584     | -3,009 to -0,1598  | Yes          | *           | 0,0168           |    |        |     |
| MAPK3                             | 5,757      | 4,339 to 7,175     | Yes          | ****        | <0,0001          |    |        |     |
| MAPK1                             | 3,258      | 1,841 to 4,676     | Yes          | ****        | <0,0001          |    |        |     |
| HIF1A                             | 2,724      | 1,306 to 4,141     | Yes          | ****        | <0,0001          |    |        |     |
| PFKL                              | 4,806      | 3,388 to 6,224     | Yes          | ****        | <0,0001          |    |        |     |
| ACACA                             | 4,055      | 2,615 to 5,495     | Yes          | ****        | <0,0001          |    |        |     |
| ACACB                             | 0,3426     | -1,075 to 1,76     | No           | ns          | >0,9999          |    |        |     |
| HMGCL                             | 0,6741     | -0,7438 to 2,092   | No           | ns          | 0,9383           |    |        |     |
| BDH1                              | -0,4025    | -1,82 to 1,015     | No           | ns          | 0,9997           |    |        |     |
| LDHA                              | 1,857      | 0,4392 to 3,275    | Yes          | **          | 0,0019           |    |        |     |
| HK2                               | -1,222     | -2,64 to 0,1959    | No           | ns          | 0,162            |    |        |     |
|                                   |            |                    |              |             |                  |    |        |     |
|                                   |            |                    |              |             |                  |    |        |     |
| Test details                      | Mean 1     | Mean 2             | Mean Diff,   | SE of diff, | N1               | N2 | t      | DF  |
|                                   |            |                    |              |             |                  |    |        |     |
| PHH HCC n=9 - HepG2 n=3           |            |                    |              |             |                  |    |        |     |
| GSK3A                             | 9,369      | 4,633              | 4,736        | 0,4811      | 26               | 9  | 9,843  | 539 |
| GSK3B                             | 8,052      | 5,827              | 2,225        | 0,4788      | 27               | 9  | 4,647  | 539 |
| FOXO1                             | 5,553      | 6,653              | -1,1         | 0,4788      | 27               | 9  | 2,298  | 539 |
| AKT1                              | 8,035      | 3,376              | 4,659        | 0,4788      | 27               | 9  | 9,73   | 539 |
| AKT2                              | 8,695      | 6,081              | 2,614        | 0,4788      | 27               | 9  | 5,46   | 539 |
| AKT3                              | 11,99      | 13,58              | -1,584       | 0,4811      | 26               | 9  | 3,293  | 539 |
| MAPK3                             | 10,77      | 5,013              | 5,757        | 0,4788      | 27               | 9  | 12,02  | 539 |
| MAPK1                             | 8,125      | 4,867              | 3,258        | 0,4788      | 27               | 9  | 6,805  | 539 |
| HIF1A                             | 6,695      | 3,972              | 2,724        | 0,4788      | 27               | 9  | 5,688  | 539 |
| PFKL                              | 9,791      | 4,985              | 4,806        | 0,4788      | 27               | 9  | 10,04  | 539 |
| ACACA                             | 11,08      | 7,023              | 4,055        | 0,4862      | 24               | 9  | 8,339  | 539 |
| ACACB                             | 8,67       | 8,327              | 0,3426       | 0,4788      | 27               | 9  | 0,7156 | 539 |
| HMGCL                             | 6,914      | 6,24               | 0,6741       | 0,4788      | 27               | 9  | 1,408  | 539 |
| BDH1                              | 7,277      | 7,68               | -0,4025      | 0,4788      | 27               | 9  | 0,8407 | 539 |
| LDHA                              | 3,36       | 1,503              | 1,857        | 0,4788      | 27               | 9  | 3,878  | 539 |
| HK2                               | 10,67      | 11,89              | -1,222       | 0,4788      | 27               | 9  | 2,552  | 539 |

**Table S9.** Values of test statistics of RT-qPCR analyses of HCC-PHHs and Huh7 cells (Figure 3B). P values of 0.05 or less were considered significant (\*\* $p \leq 0.001$ , \*\*\*\*  $p < 0.0001$ ).

|                                   |            |                    |              |             |                  |    |       |     |
|-----------------------------------|------------|--------------------|--------------|-------------|------------------|----|-------|-----|
| Number of families                | 1          |                    |              |             |                  |    |       |     |
| Number of comparisons per family  | 16         |                    |              |             |                  |    |       |     |
| Alpha                             | 0,05       |                    |              |             |                  |    |       |     |
| Sidak's multiple comparisons test | Mean Diff, | 95,00% CI of diff, | Significant? | Summary     | Adjusted P Value |    |       |     |
| PHH HCC n=9 - Huh7 n=3            |            |                    |              |             |                  |    |       |     |
| GSK3A                             | 4,723      | 3,313 to 6,133     | Yes          | ****        | <0,0001          |    |       |     |
| GSK3B                             | 2,181      | 0,7779 to 3,584    | Yes          | ****        | <0,0001          |    |       |     |
| FOXO1                             | -1,108     | -2,512 to 0,2949   | No           | ns          | 0,2727           |    |       |     |
| AKT1                              | 4,653      | 3,25 to 6,056      | Yes          | ****        | <0,0001          |    |       |     |
| AKT2                              | 2,734      | 1,331 to 4,137     | Yes          | ****        | <0,0001          |    |       |     |
| AKT3                              | -2,8       | -4,274 to -1,326   | Yes          | ****        | <0,0001          |    |       |     |
| MAPK3                             | 5,384      | 3,981 to 6,788     | Yes          | ****        | <0,0001          |    |       |     |
| MAPK1                             | 3,169      | 1,766 to 4,573     | Yes          | ****        | <0,0001          |    |       |     |
| HIF1A                             | 2,816      | 1,413 to 4,22      | Yes          | ****        | <0,0001          |    |       |     |
| PFKL                              | 4,737      | 3,334 to 6,14      | Yes          | ****        | <0,0001          |    |       |     |
| ACACA                             | 4,087      | 2,662 to 5,512     | Yes          | ****        | <0,0001          |    |       |     |
| ACACB                             | 0,5185     | -0,8848 to 1,922   | No           | ns          | 0,9941           |    |       |     |
| HMGCL                             | 0,6188     | -0,7845 to 2,022   | No           | ns          | 0,9671           |    |       |     |
| BDH1                              | -0,5014    | -1,905 to 0,9018   | No           | ns          | 0,9959           |    |       |     |
| LDHA                              | 2,088      | 0,6844 to 3,491    | Yes          | ***         | 0,0002           |    |       |     |
| HK2                               | 1,321      | -0,08227 to 2,724  | No           | ns          | 0,0845           |    |       |     |
|                                   |            |                    |              |             |                  |    |       |     |
|                                   |            |                    |              |             |                  |    |       |     |
| Test details                      | Mean 1     | Mean 2             | Mean Diff,   | SE of diff, | N1               | N2 | t     | DF  |
| PHH HCC n=9 - Huh7 n=3            |            |                    |              |             |                  |    |       |     |
| GSK3A                             | 9,369      | 4,646              | 4,723        | 0,4762      | 26               | 9  | 9,918 | 538 |
| GSK3B                             | 8,052      | 5,871              | 2,181        | 0,4739      | 27               | 9  | 4,603 | 538 |
| FOXO1                             | 5,553      | 6,661              | -1,108       | 0,4739      | 27               | 9  | 2,339 | 538 |
| AKT1                              | 8,035      | 3,382              | 4,653        | 0,4739      | 27               | 9  | 9,818 | 538 |
| AKT2                              | 8,695      | 5,961              | 2,734        | 0,4739      | 27               | 9  | 5,769 | 538 |
| AKT3                              | 11,99      | 14,79              | -2,8         | 0,4978      | 26               | 8  | 5,624 | 538 |
| MAPK3                             | 10,77      | 5,385              | 5,384        | 0,4739      | 27               | 9  | 11,36 | 538 |
| MAPK1                             | 8,125      | 4,956              | 3,169        | 0,4739      | 27               | 9  | 6,688 | 538 |
| HIF1A                             | 6,695      | 3,879              | 2,816        | 0,4739      | 27               | 9  | 5,943 | 538 |
| PFKL                              | 9,791      | 5,054              | 4,737        | 0,4739      | 27               | 9  | 9,996 | 538 |
| ACACA                             | 11,08      | 6,991              | 4,087        | 0,4812      | 24               | 9  | 8,492 | 538 |
| ACACB                             | 8,67       | 8,151              | 0,5185       | 0,4739      | 27               | 9  | 1,094 | 538 |
| HMGCL                             | 6,914      | 6,295              | 0,6188       | 0,4739      | 27               | 9  | 1,306 | 538 |
| BDH1                              | 7,277      | 7,779              | -0,5014      | 0,4739      | 27               | 9  | 1,058 | 538 |
| LDHA                              | 3,36       | 1,272              | 2,088        | 0,4739      | 27               | 9  | 4,405 | 538 |
| HK2                               | 10,67      | 9,346              | 1,321        | 0,4739      | 27               | 9  | 2,788 | 538 |

**Table S10.** Values of test statistics of RT-qPCR analyses of HCC-PHHs and PHCs (Figure 3C). P values of 0.05 or less were considered significant (\*\*  $p \leq 0.01$ , \*\*\*  $p \leq 0.001$ , \*\*\*\*  $p < 0.0001$ ).

|                                   |                           |                       |              |             |                  |    |         |     |
|-----------------------------------|---------------------------|-----------------------|--------------|-------------|------------------|----|---------|-----|
| Number of families                | 1                         |                       |              |             |                  |    |         |     |
| Number of comparisons per family  | 16                        |                       |              |             |                  |    |         |     |
| Alpha                             | 0,05                      |                       |              |             |                  |    |         |     |
| Sidak's multiple comparisons test | Predicted (LS) mean diff, | 95,00% CI of diff,    | Significant? | Summary     | Adjusted P Value |    |         |     |
| PHH HCC n=9 - PHC n=6             |                           |                       |              |             |                  |    |         |     |
| GSK3A                             | 0,8328                    | -0,4177 to 2,083      | No           | ns          | 0,5541           |    |         |     |
| GSK3B                             | 0,9777                    | -0,2423 to 2,198      | No           | ns          | 0,2525           |    |         |     |
| FOXO1                             | -0,5208                   | -1,741 to 0,6992      | No           | ns          | 0,9756           |    |         |     |
| AKT1                              | 0,0286                    | -1,191 to 1,249       | No           | ns          | >0,9999          |    |         |     |
| AKT2                              | 0,8477                    | -0,3936 to 2,089      | No           | ns          | 0,5112           |    |         |     |
| AKT3                              | 2,173                     | 0,8729 to 3,473       | Yes          | ****        | <0,0001          |    |         |     |
| MAPK3                             | 1,656                     | 0,4146 to 2,897       | Yes          | **          | 0,0014           |    |         |     |
| MAPK1                             | 1,051                     | -0,1693 to 2,271      | No           | ns          | 0,163            |    |         |     |
| HIF1A                             | 1,137                     | -0,08346 to 2,357     | No           | ns          | 0,0919           |    |         |     |
| PFKL                              | 0,7362                    | -0,4838 to 1,956      | No           | ns          | 0,7112           |    |         |     |
| ACACA                             | 1,91                      | 0,6392 to 3,181       | Yes          | ***         | 0,0002           |    |         |     |
| ACACB                             | -0,728                    | -1,993 to 0,5369      | No           | ns          | 0,7753           |    |         |     |
| HMGCL                             | -1,107                    | -2,327 to 0,1135      | No           | ns          | 0,1131           |    |         |     |
| BDH1                              | -0,7901                   | -2,010 to 0,4299      | No           | ns          | 0,601            |    |         |     |
| LDHA                              | 0,1354                    | -1,085 to 1,355       | No           | ns          | >0,9999          |    |         |     |
| HK2                               | 2,766                     | 1,546 to 3,986        | Yes          | ****        | <0,0001          |    |         |     |
| Test details                      | Predicted (LS) mean 1     | Predicted (LS) mean 2 | ted (LS) mea | SE of diff, | N1               | N2 | t       | DF  |
| PHH HCC n=9 - PHC n=6             |                           |                       |              |             |                  |    |         |     |
| GSK3A                             | 9,369                     | 8,536                 | 0,8328       | 0,4227      | 26               | 17 | 1,97    | 674 |
| GSK3B                             | 8,052                     | 7,074                 | 0,9777       | 0,4124      | 27               | 18 | 2,371   | 674 |
| FOXO1                             | 5,553                     | 6,074                 | -0,5208      | 0,4124      | 27               | 18 | 1,263   | 674 |
| AKT1                              | 8,035                     | 8,006                 | 0,0286       | 0,4124      | 27               | 18 | 0,06935 | 674 |
| AKT2                              | 8,695                     | 7,848                 | 0,8477       | 0,4196      | 27               | 17 | 2,02    | 674 |
| AKT3                              | 11,99                     | 9,819                 | 2,173        | 0,4394      | 26               | 15 | 4,945   | 674 |
| MAPK3                             | 10,77                     | 9,114                 | 1,656        | 0,4196      | 27               | 17 | 3,947   | 674 |
| MAPK1                             | 8,125                     | 7,075                 | 1,051        | 0,4124      | 27               | 18 | 2,548   | 674 |
| HIF1A                             | 6,695                     | 5,559                 | 1,137        | 0,4124      | 27               | 18 | 2,756   | 674 |
| PFKL                              | 9,791                     | 9,055                 | 0,7362       | 0,4124      | 27               | 18 | 1,785   | 674 |
| ACACA                             | 11,08                     | 9,168                 | 1,91         | 0,4296      | 24               | 17 | 4,446   | 674 |
| ACACB                             | 8,67                      | 9,398                 | -0,728       | 0,4276      | 27               | 16 | 1,703   | 674 |
| HMGCL                             | 6,914                     | 8,021                 | -1,107       | 0,4124      | 27               | 18 | 2,683   | 674 |
| BDH1                              | 7,277                     | 8,067                 | -0,7901      | 0,4124      | 27               | 18 | 1,916   | 674 |
| LDHA                              | 3,36                      | 3,225                 | 0,1354       | 0,4124      | 27               | 18 | 0,3283  | 674 |
| HK2                               | 10,67                     | 7,901                 | 2,766        | 0,4124      | 27               | 18 | 6,707   | 674 |

**Table S11.** Values of test statistics of RT-qPCR analyses of HepG2 cells and PHCs (Figure 3D). P values of 0.05 or less were considered significant (\*\*  $p \leq 0.01$ , \*\*\*\*  $p < 0.0001$ ).

|                                   |            |                    |              |             |                  |    |        |     |
|-----------------------------------|------------|--------------------|--------------|-------------|------------------|----|--------|-----|
| Number of families                | 1          |                    |              |             |                  |    |        |     |
| Number of comparisons per family  | 16         |                    |              |             |                  |    |        |     |
| Alpha                             | 0,05       |                    |              |             |                  |    |        |     |
| Sidak's multiple comparisons test | Mean Diff, | 95,00% CI of diff, | Significant? | Summary     | Adjusted P Value |    |        |     |
| HepG2 n=3 - PHC n=6               |            |                    |              |             |                  |    |        |     |
| GSK3A                             | -3,903     | -5,227 to -2,579   | Yes          | ****        | <0,0001          |    |        |     |
| GSK3B                             | -1,247     | -2,558 to 0,06365  | No           | ns          | 0,0773           |    |        |     |
| FOXO1                             | 0,5794     | -0,7316 to 1,89    | No           | ns          | 0,9661           |    |        |     |
| AKT1                              | -4,63      | -5,941 to -3,319   | Yes          | ****        | <0,0001          |    |        |     |
| AKT2                              | -1,767     | -3,091 to -0,4429  | Yes          | **          | 0,0014           |    |        |     |
| AKT3                              | 3,757      | 2,403 to 5,111     | Yes          | ****        | <0,0001          |    |        |     |
| MAPK3                             | -4,101     | -5,425 to -2,777   | Yes          | ****        | <0,0001          |    |        |     |
| MAPK1                             | -2,208     | -3,519 to -0,8967  | Yes          | ****        | <0,0001          |    |        |     |
| HIF1A                             | -1,587     | -2,898 to -0,2761  | Yes          | **          | 0,0059           |    |        |     |
| PFKL                              | -4,07      | -5,381 to -2,759   | Yes          | ****        | <0,0001          |    |        |     |
| ACACA                             | -2,145     | -3,469 to -0,8211  | Yes          | ****        | <0,0001          |    |        |     |
| ACACB                             | -1,071     | -2,409 to 0,2674   | No           | ns          | 0,2536           |    |        |     |
| HMGCL                             | -1,781     | -3,092 to -0,4696  | Yes          | **          | 0,0011           |    |        |     |
| BDH1                              | -0,3875    | -1,699 to 0,9235   | No           | ns          | 0,9995           |    |        |     |
| LDHA                              | -1,722     | -3,033 to -0,4106  | Yes          | **          | 0,0018           |    |        |     |
| HK2                               | 3,988      | 2,677 to 5,299     | Yes          | ****        | <0,0001          |    |        |     |
|                                   |            |                    |              |             |                  |    |        |     |
|                                   |            |                    |              |             |                  |    |        |     |
| Test details                      | Mean 1     | Mean 2             | Mean Diff,   | SE of diff, | N1               | N2 | t      | DF  |
| HepG2 n=3 - PHC n=6               |            |                    |              |             |                  |    |        |     |
| GSK3A                             | 4,633      | 8,536              | -3,903       | 0,4463      | 9                | 17 | 8,745  | 391 |
| GSK3B                             | 5,827      | 7,074              | -1,247       | 0,442       | 9                | 18 | 2,822  | 391 |
| FOXO1                             | 6,653      | 6,074              | 0,5794       | 0,442       | 9                | 18 | 1,311  | 391 |
| AKT1                              | 3,376      | 8,006              | -4,63        | 0,442       | 9                | 18 | 10,48  | 391 |
| AKT2                              | 6,081      | 7,848              | -1,767       | 0,4463      | 9                | 17 | 3,959  | 391 |
| AKT3                              | 13,58      | 9,819              | 3,757        | 0,4565      | 9                | 15 | 8,231  | 391 |
| MAPK3                             | 5,013      | 9,114              | -4,101       | 0,4463      | 9                | 17 | 9,188  | 391 |
| MAPK1                             | 4,867      | 7,075              | -2,208       | 0,442       | 9                | 18 | 4,995  | 391 |
| HIF1A                             | 3,972      | 5,559              | -1,587       | 0,442       | 9                | 18 | 3,591  | 391 |
| PFKL                              | 4,985      | 9,055              | -4,07        | 0,442       | 9                | 18 | 9,208  | 391 |
| ACACA                             | 7,023      | 9,168              | -2,145       | 0,4463      | 9                | 17 | 4,806  | 391 |
| ACACB                             | 8,327      | 9,398              | -1,071       | 0,4511      | 9                | 16 | 2,373  | 391 |
| HMGCL                             | 6,24       | 8,021              | -1,781       | 0,442       | 9                | 18 | 4,029  | 391 |
| BDH1                              | 7,68       | 8,067              | -0,3875      | 0,442       | 9                | 18 | 0,8768 | 391 |
| LDHA                              | 1,503      | 3,225              | -1,722       | 0,442       | 9                | 18 | 3,895  | 391 |
| HK2                               | 11,89      | 7,901              | 3,988        | 0,442       | 9                | 18 | 9,022  | 391 |



**Table S12.** Values of test statistics of protein expression analyses of GSK3A (Figure 4A). P values of 0.05 or less were considered significant (\*\*  $p \leq 0.001$ , \*\*\*  $p < 0.0001$ ).

|                                          |                   |                           |                     |                    |                         |           |          |           |
|------------------------------------------|-------------------|---------------------------|---------------------|--------------------|-------------------------|-----------|----------|-----------|
| Number of families                       | 1                 |                           |                     |                    |                         |           |          |           |
| Number of comparisons per family         | 10                |                           |                     |                    |                         |           |          |           |
| Alpha                                    | 0,05              |                           |                     |                    |                         |           |          |           |
|                                          |                   |                           |                     |                    |                         |           |          |           |
| <b>Tukey's multiple comparisons test</b> | <b>Mean Diff,</b> | <b>95,00% CI of diff,</b> | <b>Significant?</b> | <b>Summary</b>     | <b>Adjusted P Value</b> |           |          |           |
| Column A vs. Column B                    | 0,1621            | -6,337 to 6,662           | No                  | ns                 | >0,9999                 | A-B       |          |           |
| Column A vs. PHC                         | 0,1605            | -6,094 to 6,415           | No                  | ns                 | >0,9999                 | A-C       |          |           |
| Column A vs. HepG2                       | -15,62            | -23,02 to -8,224          | Yes                 | ****               | <0,0001                 | A-D       |          |           |
| Column A vs. Huh7                        | -14,62            | -22,02 to -7,221          | Yes                 | ***                | 0,0001                  | A-E       |          |           |
| Column B vs. PHC                         | -0,00162          | -5,869 to 5,865           | No                  | ns                 | >0,9999                 | B-C       |          |           |
| Column B vs. HepG2                       | -15,79            | -22,86 to -8,710          | Yes                 | ****               | <0,0001                 | B-D       |          |           |
| Column B vs. Huh7                        | -14,78            | -21,86 to -7,708          | Yes                 | ****               | <0,0001                 | B-E       |          |           |
| PHC vs. HepG2                            | -15,78            | -22,64 to -8,933          | Yes                 | ****               | <0,0001                 | C-D       |          |           |
| PHC vs. Huh7                             | -14,78            | -21,63 to -7,931          | Yes                 | ****               | <0,0001                 | C-E       |          |           |
| HepG2 vs. Huh7                           | 1,003             | -6,908 to 8,914           | No                  | ns                 | 0,9947                  | D-E       |          |           |
|                                          |                   |                           |                     |                    |                         |           |          |           |
| <b>Test details</b>                      | <b>Mean 1</b>     | <b>Mean 2</b>             | <b>Mean Diff,</b>   | <b>SE of diff,</b> | <b>n1</b>               | <b>n2</b> | <b>q</b> | <b>DF</b> |
| Column A vs. Column B                    | 0,346             | 0,1838                    | 0,1621              | 2,121              | 4                       | 5         | 0,1081   | 16        |
| Column A vs. PHC                         | 0,346             | 0,1855                    | 0,1605              | 2,041              | 4                       | 6         | 0,1112   | 16        |
| Column A vs. HepG2                       | 0,346             | 15,97                     | -15,62              | 2,415              | 4                       | 3         | 9,148    | 16        |
| Column A vs. Huh7                        | 0,346             | 14,97                     | -14,62              | 2,415              | 4                       | 3         | 8,561    | 16        |
| Column B vs. PHC                         | 0,1838            | 0,1855                    | -0,00162            | 1,915              | 5                       | 6         | 0,001196 | 16        |
| Column B vs. HepG2                       | 0,1838            | 15,97                     | -15,79              | 2,31               | 5                       | 3         | 9,666    | 16        |
| Column B vs. Huh7                        | 0,1838            | 14,97                     | -14,78              | 2,31               | 5                       | 3         | 9,052    | 16        |
| PHC vs. HepG2                            | 0,1855            | 15,97                     | -15,78              | 2,236              | 6                       | 3         | 9,982    | 16        |
| PHC vs. Huh7                             | 0,1855            | 14,97                     | -14,78              | 2,236              | 6                       | 3         | 9,348    | 16        |
| HepG2 vs. Huh7                           | 15,97             | 14,97                     | 1,003               | 2,582              | 3                       | 3         | 0,5492   | 16        |

**Table S13.** Values of test statistics of protein expression analyses of PFKL (Figure 4B). P values of 0.05 or less were considered significant (\*\*  $p \leq 0.01$ ).

|                                          |                   |                           |                     |                    |                         |           |          |           |
|------------------------------------------|-------------------|---------------------------|---------------------|--------------------|-------------------------|-----------|----------|-----------|
| Number of families                       | 1                 |                           |                     |                    |                         |           |          |           |
| Number of comparisons per family         | 10                |                           |                     |                    |                         |           |          |           |
| Alpha                                    | 0,05              |                           |                     |                    |                         |           |          |           |
|                                          |                   |                           |                     |                    |                         |           |          |           |
| <b>Tukey's multiple comparisons test</b> | <b>Mean Diff,</b> | <b>95,00% CI of diff,</b> | <b>Significant?</b> | <b>Summary</b>     | <b>Adjusted P Value</b> |           |          |           |
| Column A vs. Column B                    | 0,8009            | 0,2591 to 1,343           | Yes                 | **                 | 0,0027                  | A-B       |          |           |
| Column A vs. PHC                         | 0,7679            | 0,2466 to 1,289           | Yes                 | **                 | 0,0028                  | A-C       |          |           |
| Column A vs. HepG2                       | -0,0427           | -0,6596 to 0,5742         | No                  | ns                 | 0,9995                  | A-D       |          |           |
| Column A vs. Huh7                        | 0,2952            | -0,3217 to 0,9121         | No                  | ns                 | 0,5972                  | A-E       |          |           |
| Column B vs. PHC                         | -0,03299          | -0,5221 to 0,4561         | No                  | ns                 | 0,9995                  | B-C       |          |           |
| Column B vs. HepG2                       | -0,8436           | -1,433 to -0,2538         | Yes                 | **                 | 0,0037                  | B-D       |          |           |
| Column B vs. Huh7                        | -0,5058           | -1,096 to 0,08411         | No                  | ns                 | 0,112                   | B-E       |          |           |
| PHC vs. HepG2                            | -0,8106           | -1,382 to -0,2395         | Yes                 | **                 | 0,0039                  | C-D       |          |           |
| PHC vs. Huh7                             | -0,4728           | -1,044 to 0,09836         | No                  | ns                 | 0,1313                  | C-E       |          |           |
| HepG2 vs. Huh7                           | 0,3379            | -0,3216 to 0,9974         | No                  | ns                 | 0,5358                  | D-E       |          |           |
|                                          |                   |                           |                     |                    |                         |           |          |           |
| <b>Test details</b>                      | <b>Mean 1</b>     | <b>Mean 2</b>             | <b>Mean Diff,</b>   | <b>SE of diff,</b> | <b>n1</b>               | <b>n2</b> | <b>q</b> | <b>DF</b> |
| Column A vs. Column B                    | 1,158             | 0,357                     | 0,8009              | 0,1769             | 4                       | 5         | 6,405    | 16        |
| Column A vs. PHC                         | 1,158             | 0,39                      | 0,7679              | 0,1702             | 4                       | 6         | 6,382    | 16        |
| Column A vs. HepG2                       | 1,158             | 1,201                     | -0,0427             | 0,2014             | 4                       | 3         | 0,2999   | 16        |
| Column A vs. Huh7                        | 1,158             | 0,8628                    | 0,2952              | 0,2014             | 4                       | 3         | 2,073    | 16        |
| Column B vs. PHC                         | 0,357             | 0,39                      | -0,03299            | 0,1596             | 5                       | 6         | 0,2922   | 16        |
| Column B vs. HepG2                       | 0,357             | 1,201                     | -0,8436             | 0,1925             | 5                       | 3         | 6,197    | 16        |
| Column B vs. Huh7                        | 0,357             | 0,8628                    | -0,5058             | 0,1925             | 5                       | 3         | 3,715    | 16        |
| PHC vs. HepG2                            | 0,39              | 1,201                     | -0,8106             | 0,1864             | 6                       | 3         | 6,15     | 16        |
| PHC vs. Huh7                             | 0,39              | 0,8628                    | -0,4728             | 0,1864             | 6                       | 3         | 3,586    | 16        |
| HepG2 vs. Huh7                           | 1,201             | 0,8628                    | 0,3379              | 0,2153             | 3                       | 3         | 2,22     | 16        |

**Table S14.** Values of test statistics of protein expression analyses of HK2 (Figure 4C). P values of 0.05 or less were considered significant (\*\*  $p \leq 0.01$ , \*\*\*  $p < 0.0001$ ).

|                                          |                   |                           |                     |                    |                         |           |          |           |
|------------------------------------------|-------------------|---------------------------|---------------------|--------------------|-------------------------|-----------|----------|-----------|
| Number of families                       | 1                 |                           |                     |                    |                         |           |          |           |
| Number of comparisons per family         | 10                |                           |                     |                    |                         |           |          |           |
| Alpha                                    | 0,05              |                           |                     |                    |                         |           |          |           |
|                                          |                   |                           |                     |                    |                         |           |          |           |
| <b>Tukey's multiple comparisons test</b> | <b>Mean Diff,</b> | <b>95,00% CI of diff,</b> | <b>Significant?</b> | <b>Summary</b>     | <b>Adjusted P Value</b> |           |          |           |
| Column A vs. Column B                    | 0,2123            | -0,5350 to 0,9595         | No                  | ns                 | 0,9036                  | A-B       |          |           |
| Column A vs. PHC                         | 0,2053            | -0,5138 to 0,9243         | No                  | ns                 | 0,9021                  | A-C       |          |           |
| Column A vs. HepG2                       | -5,494            | -6,345 to -4,644          | Yes                 | ****               | <0,0001                 | A-D       |          |           |
| Column A vs. Huh7                        | -6,776            | -7,626 to -5,925          | Yes                 | ****               | <0,0001                 | A-E       |          |           |
| Column B vs. PHC                         | -0,006988         | -0,6815 to 0,6675         | No                  | ns                 | >0,9999                 | B-C       |          |           |
| Column B vs. HepG2                       | -5,707            | -6,520 to -4,893          | Yes                 | ****               | <0,0001                 | B-D       |          |           |
| Column B vs. Huh7                        | -6,988            | -7,801 to -6,174          | Yes                 | ****               | <0,0001                 | B-E       |          |           |
| PHC vs. HepG2                            | -5,7              | -6,487 to -4,912          | Yes                 | ****               | <0,0001                 | C-D       |          |           |
| PHC vs. Huh7                             | -6,981            | -7,769 to -6,193          | Yes                 | ****               | <0,0001                 | C-E       |          |           |
| HepG2 vs. Huh7                           | -1,281            | -2,191 to -0,3716         | Yes                 | **                 | 0,0042                  | D-E       |          |           |
|                                          |                   |                           |                     |                    |                         |           |          |           |
| <b>Test details</b>                      | <b>Mean 1</b>     | <b>Mean 2</b>             | <b>Mean Diff,</b>   | <b>SE of diff,</b> | <b>n1</b>               | <b>n2</b> | <b>q</b> | <b>DF</b> |
| Column A vs. Column B                    | 0,2533            | 0,04102                   | 0,2123              | 0,2439             | 4                       | 5         | 1,231    | 16        |
| Column A vs. PHC                         | 0,2533            | 0,04801                   | 0,2053              | 0,2347             | 4                       | 6         | 1,237    | 16        |
| Column A vs. HepG2                       | 0,2533            | 5,748                     | -5,494              | 0,2777             | 4                       | 3         | 27,98    | 16        |
| Column A vs. Huh7                        | 0,2533            | 7,029                     | -6,776              | 0,2777             | 4                       | 3         | 34,51    | 16        |
| Column B vs. PHC                         | 0,04102           | 0,04801                   | -0,006988           | 0,2202             | 5                       | 6         | 0,04489  | 16        |
| Column B vs. HepG2                       | 0,04102           | 5,748                     | -5,707              | 0,2655             | 5                       | 3         | 30,39    | 16        |
| Column B vs. Huh7                        | 0,04102           | 7,029                     | -6,988              | 0,2655             | 5                       | 3         | 37,22    | 16        |
| PHC vs. HepG2                            | 0,04801           | 5,748                     | -5,7                | 0,2571             | 6                       | 3         | 31,35    | 16        |
| PHC vs. Huh7                             | 0,04801           | 7,029                     | -6,981              | 0,2571             | 6                       | 3         | 38,4     | 16        |
| HepG2 vs. Huh7                           | 5,748             | 7,029                     | -1,281              | 0,2969             | 3                       | 3         | 6,103    | 16        |

**Table S15.** Values of test statistics of protein expression analyses of ACACB (Figure 4D). P values of 0.05 or less were considered significant (\*  $p \leq 0.05$ , \*\*  $p \leq 0.01$ , \*\*\*  $p \leq 0.001$ ).

|                                          |                   |                           |                     |                    |                         |           |          |           |
|------------------------------------------|-------------------|---------------------------|---------------------|--------------------|-------------------------|-----------|----------|-----------|
| Number of families                       | 1                 |                           |                     |                    |                         |           |          |           |
| Number of comparisons per family         | 10                |                           |                     |                    |                         |           |          |           |
| Alpha                                    | 0,05              |                           |                     |                    |                         |           |          |           |
|                                          |                   |                           |                     |                    |                         |           |          |           |
| <b>Tukey's multiple comparisons test</b> | <b>Mean Diff,</b> | <b>95,00% CI of diff,</b> | <b>Significant?</b> | <b>Summary</b>     | <b>Adjusted P Value</b> |           |          |           |
| Column A vs. Column B                    | 0,3049            | -0,2014 to 0,8112         | No                  | ns                 | 0,3836                  | A-B       |          |           |
| Column A vs. PHC                         | 0,9124            | 0,4253 to 1,400           | Yes                 | ***                | 0,0003                  | A-C       |          |           |
| Column A vs. HepG2                       | 0,9461            | 0,3696 to 1,523           | Yes                 | **                 | 0,001                   | A-D       |          |           |
| Column A vs. Huh7                        | 0,9551            | 0,3787 to 1,532           | Yes                 | ***                | 0,0009                  | A-E       |          |           |
| Column B vs. PHC                         | 0,6075            | 0,1505 to 1,065           | Yes                 | **                 | 0,0068                  | B-C       |          |           |
| Column B vs. HepG2                       | 0,6412            | 0,08999 to 1,192          | Yes                 | *                  | 0,0188                  | B-D       |          |           |
| Column B vs. Huh7                        | 0,6502            | 0,09904 to 1,201          | Yes                 | *                  | 0,017                   | B-E       |          |           |
| PHC vs. HepG2                            | 0,03365           | -0,5000 to 0,5673         | No                  | ns                 | 0,9997                  | C-D       |          |           |
| PHC vs. Huh7                             | 0,0427            | -0,4910 to 0,5764         | No                  | ns                 | 0,9991                  | C-E       |          |           |
| HepG2 vs. Huh7                           | 0,00905           | -0,6072 to 0,6253         | No                  | ns                 | >0,9999                 | D-E       |          |           |
|                                          |                   |                           |                     |                    |                         |           |          |           |
| <b>Test details</b>                      | <b>Mean 1</b>     | <b>Mean 2</b>             | <b>Mean Diff,</b>   | <b>SE of diff,</b> | <b>n1</b>               | <b>n2</b> | <b>q</b> | <b>DF</b> |
| Column A vs. Column B                    | 1,031             | 0,7262                    | 0,3049              | 0,1653             | 4                       | 5         | 2,609    | 16        |
| Column A vs. PHC                         | 1,031             | 0,1187                    | 0,9124              | 0,159              | 4                       | 6         | 8,115    | 16        |
| Column A vs. HepG2                       | 1,031             | 0,08506                   | 0,9461              | 0,1882             | 4                       | 3         | 7,111    | 16        |
| Column A vs. Huh7                        | 1,031             | 0,07601                   | 0,9551              | 0,1882             | 4                       | 3         | 7,179    | 16        |
| Column B vs. PHC                         | 0,7262            | 0,1187                    | 0,6075              | 0,1492             | 5                       | 6         | 5,76     | 16        |
| Column B vs. HepG2                       | 0,7262            | 0,08506                   | 0,6412              | 0,1799             | 5                       | 3         | 5,04     | 16        |
| Column B vs. Huh7                        | 0,7262            | 0,07601                   | 0,6502              | 0,1799             | 5                       | 3         | 5,111    | 16        |
| PHC vs. HepG2                            | 0,1187            | 0,08506                   | 0,03365             | 0,1742             | 6                       | 3         | 0,2732   | 16        |
| PHC vs. Huh7                             | 0,1187            | 0,07601                   | 0,0427              | 0,1742             | 6                       | 3         | 0,3467   | 16        |
| HepG2 vs. Huh7                           | 0,08506           | 0,07601                   | 0,00905             | 0,2011             | 3                       | 3         | 0,06363  | 16        |

**Table S16.** Values of test statistics of protein expression analyses of BDH1 (Figure 4E). P values of 0.05 or less were considered significant (\*  $p \leq 0.05$ ).

|                                   |            |                   |              |             |                  |     |        |    |
|-----------------------------------|------------|-------------------|--------------|-------------|------------------|-----|--------|----|
| Number of families                | 1          |                   |              |             |                  |     |        |    |
| Number of comparisons per family  | 10         |                   |              |             |                  |     |        |    |
| Alpha                             | 0,05       |                   |              |             |                  |     |        |    |
|                                   |            |                   |              |             |                  |     |        |    |
| Tukey's multiple comparisons test | Mean Diff, | diff,             | Significant? | Summary     | Adjusted P Value |     |        |    |
| Column A vs. Column B             | -4,165     | -7,619 to -0,7100 | Yes          | *           | 0,0146           | A-B |        |    |
| Column A vs. PHC                  | -2,149     | -5,473 to 1,175   | No           | ns          | 0,3184           | A-C |        |    |
| Column A vs. HepG2                | -1,109     | -5,042 to 2,824   | No           | ns          | 0,9059           | A-D |        |    |
| Column A vs. Huh7                 | -0,995     | -4,928 to 2,938   | No           | ns          | 0,9342           | A-E |        |    |
| Column B vs. PHC                  | 2,016      | -1,103 to 5,134   | No           | ns          | 0,3184           | B-C |        |    |
| Column B vs. HepG2                | 3,056      | -0,7052 to 6,817  | No           | ns          | 0,1424           | B-D |        |    |
| Column B vs. Huh7                 | 3,17       | -0,5913 to 6,931  | No           | ns          | 0,1212           | B-E |        |    |
| PHC vs. HepG2                     | 1,04       | -2,601 to 4,681   | No           | ns          | 0,9019           | C-D |        |    |
| PHC vs. Huh7                      | 1,154      | -2,488 to 4,795   | No           | ns          | 0,8643           | C-E |        |    |
| HepG2 vs. Huh7                    | 0,1139     | -4,091 to 4,319   | No           | ns          | >0,9999          | D-E |        |    |
|                                   |            |                   |              |             |                  |     |        |    |
| Test details                      | Mean 1     | Mean 2            | Mean Diff,   | SE of diff, | n1               | n2  | q      | DF |
| Column A vs. Column B             | 0,456      | 4,621             | -4,165       | 1,128       | 4                | 5   | 5,223  | 16 |
| Column A vs. PHC                  | 0,456      | 2,605             | -2,149       | 1,085       | 4                | 6   | 2,801  | 16 |
| Column A vs. HepG2                | 0,456      | 1,565             | -1,109       | 1,284       | 4                | 3   | 1,222  | 16 |
| Column A vs. Huh7                 | 0,456      | 1,451             | -0,995       | 1,284       | 4                | 3   | 1,096  | 16 |
| Column B vs. PHC                  | 4,621      | 2,605             | 2,016        | 1,018       | 5                | 6   | 2,801  | 16 |
| Column B vs. HepG2                | 4,621      | 1,565             | 3,056        | 1,228       | 5                | 3   | 3,52   | 16 |
| Column B vs. Huh7                 | 4,621      | 1,451             | 3,17         | 1,228       | 5                | 3   | 3,651  | 16 |
| PHC vs. HepG2                     | 2,605      | 1,565             | 1,04         | 1,189       | 6                | 3   | 1,237  | 16 |
| PHC vs. Huh7                      | 2,605      | 1,451             | 1,154        | 1,189       | 6                | 3   | 1,373  | 16 |
| HepG2 vs. Huh7                    | 1,565      | 1,451             | 0,1139       | 1,372       | 3                | 3   | 0,1174 | 16 |

**Table S17.** Values of test statistics of protein expression analyses of LDHA (Figure 4F). P values of 0.05 or less were considered significant (\*  $p \leq 0.05$ , \*\*  $p \leq 0.01$ , \*\*\*  $p \leq 0.001$ ).

|                                   |            |                    |              |             |                  |     |        |    |
|-----------------------------------|------------|--------------------|--------------|-------------|------------------|-----|--------|----|
| Number of families                | 1          |                    |              |             |                  |     |        |    |
| Number of comparisons per family  | 10         |                    |              |             |                  |     |        |    |
| Alpha                             | 0,05       |                    |              |             |                  |     |        |    |
|                                   |            |                    |              |             |                  |     |        |    |
| Tukey's multiple comparisons test | Mean Diff, | 95,00% CI of diff, | Significant? | Summary     | Adjusted P Value |     |        |    |
| Column A vs. Column B             | -0,9055    | -5,486 to 3,675    | No           | ns          | 0,9712           | A-B |        |    |
| Column A vs. PHC                  | 1,831      | -2,351 to 6,013    | No           | ns          | 0,665            | A-C |        |    |
| Column A vs. HepG2                | -7,186     | -12,13 to -2,238   | Yes          | **          | 0,0034           | A-D |        |    |
| Column A vs. Huh7                 | -4,41      | -9,358 to 0,5377   | No           | ns          | 0,0922           | A-E |        |    |
| Column B vs. PHC                  | 2,736      | -1,445 to 6,918    | No           | ns          | 0,3031           | B-C |        |    |
| Column B vs. HepG2                | -6,281     | -11,23 to -1,333   | Yes          | *           | 0,0102           | B-D |        |    |
| Column B vs. Huh7                 | -3,505     | -8,453 to 1,443    | No           | ns          | 0,2367           | B-E |        |    |
| PHC vs. HepG2                     | -9,017     | -13,60 to -4,437   | Yes          | ***         | 0,0002           | C-D |        |    |
| PHC vs. Huh7                      | -6,241     | -10,82 to -1,660   | Yes          | **          | 0,0058           | C-E |        |    |
| HepG2 vs. Huh7                    | 2,776      | -2,513 to 8,066    | No           | ns          | 0,5075           | D-E |        |    |
|                                   |            |                    |              |             |                  |     |        |    |
| Test details                      | Mean 1     | Mean 2             | Mean Diff,   | SE of diff, | n1               | n2  | q      | DF |
| Column A vs. Column B             | 3,4        | 4,305              | -0,9055      | 1,484       | 4                | 4   | 0,8632 | 15 |
| Column A vs. PHC                  | 3,4        | 1,569              | 1,831        | 1,354       | 4                | 6   | 1,912  | 15 |
| Column A vs. HepG2                | 3,4        | 10,59              | -7,186       | 1,602       | 4                | 3   | 6,343  | 15 |
| Column A vs. Huh7                 | 3,4        | 7,81               | -4,41        | 1,602       | 4                | 3   | 3,892  | 15 |
| Column B vs. PHC                  | 4,305      | 1,569              | 2,736        | 1,354       | 4                | 6   | 2,858  | 15 |
| Column B vs. HepG2                | 4,305      | 10,59              | -6,281       | 1,602       | 4                | 3   | 5,543  | 15 |
| Column B vs. Huh7                 | 4,305      | 7,81               | -3,505       | 1,602       | 4                | 3   | 3,093  | 15 |
| PHC vs. HepG2                     | 1,569      | 10,59              | -9,017       | 1,484       | 6                | 3   | 8,596  | 15 |
| PHC vs. Huh7                      | 1,569      | 7,81               | -6,241       | 1,484       | 6                | 3   | 5,95   | 15 |
| HepG2 vs. Huh7                    | 10,59      | 7,81               | 2,776        | 1,713       | 3                | 3   | 2,292  | 15 |

**Table S18.** Values of test statistics of glucose consumption analyses (Figure 5A).

|                                          |                   |                           |                     |                    |                         |           |          |           |
|------------------------------------------|-------------------|---------------------------|---------------------|--------------------|-------------------------|-----------|----------|-----------|
| Number of families                       | 1                 |                           |                     |                    |                         |           |          |           |
| Number of comparisons per family         | 6                 |                           |                     |                    |                         |           |          |           |
| Alpha                                    | 0,05              |                           |                     |                    |                         |           |          |           |
|                                          |                   |                           |                     |                    |                         |           |          |           |
| <b>Tukey's multiple comparisons test</b> | <b>Mean Diff,</b> | <b>95,00% CI of diff,</b> | <b>Significant?</b> | <b>Summary</b>     | <b>Adjusted P Value</b> |           |          |           |
| Column A vs. Column B                    | 0,6793            | -0,7822 to 2,141          | No                  | ns                 | 0,5147                  | A-B       |          |           |
| Column A vs. HepG2                       | 0,004667          | -1,574 to 1,583           | No                  | ns                 | >0,9999                 | A-C       |          |           |
| Column A vs. Huh7                        | -0,008            | -1,587 to 1,571           | No                  | ns                 | >0,9999                 | A-D       |          |           |
| Column B vs. HepG2                       | -0,6746           | -2,253 to 0,9040          | No                  | ns                 | 0,579                   | B-C       |          |           |
| Column B vs. Huh7                        | -0,6873           | -2,266 to 0,8913          | No                  | ns                 | 0,565                   | B-D       |          |           |
| HepG2 vs. Huh7                           | -0,01267          | -1,700 to 1,675           | No                  | ns                 | >0,9999                 | C-D       |          |           |
|                                          |                   |                           |                     |                    |                         |           |          |           |
| <b>Test details</b>                      | <b>Mean 1</b>     | <b>Mean 2</b>             | <b>Mean Diff,</b>   | <b>SE of diff,</b> | <b>n1</b>               | <b>n2</b> | <b>q</b> | <b>DF</b> |
| Column A vs. Column B                    | 0,03              | -0,6493                   | 0,6793              | 0,4777             | 4                       | 4         | 2,011    | 10        |
| Column A vs. HepG2                       | 0,03              | 0,02533                   | 0,004667            | 0,516              | 4                       | 3         | 0,01279  | 10        |
| Column A vs. Huh7                        | 0,03              | 0,038                     | -0,008              | 0,516              | 4                       | 3         | 0,02193  | 10        |
| Column B vs. HepG2                       | -0,6493           | 0,02533                   | -0,6746             | 0,516              | 4                       | 3         | 1,849    | 10        |
| Column B vs. Huh7                        | -0,6493           | 0,038                     | -0,6873             | 0,516              | 4                       | 3         | 1,884    | 10        |
| HepG2 vs. Huh7                           | 0,02533           | 0,038                     | -0,01267            | 0,5516             | 3                       | 3         | 0,03247  | 10        |

**Table S19.** Values of test statistics of glycogen storage analyses (Figure 5B). P values of 0.05 or less were considered significant (\*\* $p \leq 0.001$ , \*\*\*\* $p < 0.0001$ ).

|                                          |                   |                           |                     |                    |                         |           |          |           |
|------------------------------------------|-------------------|---------------------------|---------------------|--------------------|-------------------------|-----------|----------|-----------|
| Number of families                       | 1                 |                           |                     |                    |                         |           |          |           |
| Number of comparisons per family         | 6                 |                           |                     |                    |                         |           |          |           |
| Alpha                                    | 0,05              |                           |                     |                    |                         |           |          |           |
|                                          |                   |                           |                     |                    |                         |           |          |           |
| <b>Tukey's multiple comparisons test</b> | <b>Mean Diff,</b> | <b>95,00% CI of diff,</b> | <b>Significant?</b> | <b>Summary</b>     | <b>Adjusted P Value</b> |           |          |           |
| Column A vs. Column B                    | 844,1             | 537,7 to 1150             | Yes                 | ****               | <0,0001                 | A-B       |          |           |
| Column A vs. HepG2                       | 720,3             | 389,4 to 1051             | Yes                 | ***                | 0,0003                  | A-C       |          |           |
| Column A vs. Huh7                        | 720,5             | 389,6 to 1051             | Yes                 | ***                | 0,0003                  | A-D       |          |           |
| Column B vs. HepG2                       | -123,8            | -454,7 to 207,1           | No                  | ns                 | 0,6721                  | B-C       |          |           |
| Column B vs. Huh7                        | -123,6            | -454,4 to 207,3           | No                  | ns                 | 0,6735                  | B-D       |          |           |
| HepG2 vs. Huh7                           | 0,255             | -353,5 to 354,0           | No                  | ns                 | >0,9999                 | C-D       |          |           |
|                                          |                   |                           |                     |                    |                         |           |          |           |
| <b>Test details</b>                      | <b>Mean 1</b>     | <b>Mean 2</b>             | <b>Mean Diff,</b>   | <b>SE of diff,</b> | <b>n1</b>               | <b>n2</b> | <b>q</b> | <b>DF</b> |
| Column A vs. Column B                    | 846,2             | 2,104                     | 844,1               | 100,1              | 4                       | 4         | 11,92    | 10        |
| Column A vs. HepG2                       | 846,2             | 125,9                     | 720,3               | 108,2              | 4                       | 3         | 9,418    | 10        |
| Column A vs. Huh7                        | 846,2             | 125,7                     | 720,5               | 108,2              | 4                       | 3         | 9,422    | 10        |
| Column B vs. HepG2                       | 2,104             | 125,9                     | -123,8              | 108,2              | 4                       | 3         | 1,619    | 10        |
| Column B vs. Huh7                        | 2,104             | 125,7                     | -123,6              | 108,2              | 4                       | 3         | 1,616    | 10        |
| HepG2 vs. Huh7                           | 125,9             | 125,7                     | 0,255               | 115,6              | 3                       | 3         | 0,003119 | 10        |

**Table S20.** Values of test statistics of lactate consumption analyses (Figure 5C). P values of 0.05 or less were considered significant (\*\*\*  $p < 0.0001$ ).

|                                          |                   |                           |                     |                    |                         |           |          |           |
|------------------------------------------|-------------------|---------------------------|---------------------|--------------------|-------------------------|-----------|----------|-----------|
| Number of families                       | 1                 |                           |                     |                    |                         |           |          |           |
| Number of comparisons per family         | 6                 |                           |                     |                    |                         |           |          |           |
| Alpha                                    | 0,05              |                           |                     |                    |                         |           |          |           |
|                                          |                   |                           |                     |                    |                         |           |          |           |
| <b>Tukey's multiple comparisons test</b> | <b>Mean Diff,</b> | <b>95,00% CI of diff,</b> | <b>Significant?</b> | <b>Summary</b>     | <b>Adjusted P Value</b> |           |          |           |
| Column A vs. Column B                    | -0,145            | -0,1993 to -0,09066       | Yes                 | ****               | <0,0001                 | A-B       |          |           |
| Column A vs. HepG2                       | -0,0005           | -0,05919 to 0,05819       | No                  | ns                 | >0,9999                 | A-C       |          |           |
| Column A vs. Huh7                        | 0,009833          | -0,04886 to 0,06852       | No                  | ns                 | 0,9542                  | A-D       |          |           |
| Column B vs. HepG2                       | 0,1445            | 0,08581 to 0,2032         | Yes                 | ****               | <0,0001                 | B-C       |          |           |
| Column B vs. Huh7                        | 0,1548            | 0,09614 to 0,2135         | Yes                 | ****               | <0,0001                 | B-D       |          |           |
| HepG2 vs. Huh7                           | 0,01033           | -0,05241 to 0,07307       | No                  | ns                 | 0,9563                  | C-D       |          |           |
|                                          |                   |                           |                     |                    |                         |           |          |           |
| <b>Test details</b>                      | <b>Mean 1</b>     | <b>Mean 2</b>             | <b>Mean Diff,</b>   | <b>SE of diff,</b> | <b>n1</b>               | <b>n2</b> | <b>q</b> | <b>DF</b> |
| Column A vs. Column B                    | -0,0185           | 0,1265                    | -0,145              | 0,01776            | 4                       | 4         | 11,55    | 10        |
| Column A vs. HepG2                       | -0,0185           | -0,018                    | -0,0005             | 0,01918            | 4                       | 3         | 0,03686  | 10        |
| Column A vs. Huh7                        | -0,0185           | -0,02833                  | 0,009833            | 0,01918            | 4                       | 3         | 0,7249   | 10        |
| Column B vs. HepG2                       | 0,1265            | -0,018                    | 0,1445              | 0,01918            | 4                       | 3         | 10,65    | 10        |
| Column B vs. Huh7                        | 0,1265            | -0,02833                  | 0,1548              | 0,01918            | 4                       | 3         | 11,41    | 10        |
| HepG2 vs. Huh7                           | -0,018            | -0,02833                  | 0,01033             | 0,02051            | 3                       | 3         | 0,7126   | 10        |

**Table S21.** Values of test statistics of pyruvate analyses (Figure 5D). P values of 0.05 or less were considered significant (\*\*  $p \leq 0.01$ , \*\*\*  $p \leq 0.001$ , \*\*\*\*  $p < 0.0001$ ).

|                                          |                   |                           |                     |                    |                         |           |          |           |
|------------------------------------------|-------------------|---------------------------|---------------------|--------------------|-------------------------|-----------|----------|-----------|
| Number of families                       | 1                 |                           |                     |                    |                         |           |          |           |
| Number of comparisons per family         | 6                 |                           |                     |                    |                         |           |          |           |
| Alpha                                    | 0,05              |                           |                     |                    |                         |           |          |           |
|                                          |                   |                           |                     |                    |                         |           |          |           |
| <b>Tukey's multiple comparisons test</b> | <b>Mean Diff,</b> | <b>95,00% CI of diff,</b> | <b>Significant?</b> | <b>Summary</b>     | <b>Adjusted P Value</b> |           |          |           |
| Column A vs. Column B                    | 1,216             | 0,9006 to 1,532           | Yes                 | ****               | <0,0001                 | A-B       |          |           |
| Column A vs. HepG2                       | 0,6777            | 0,3404 to 1,015           | Yes                 | ***                | 0,0007                  | A-C       |          |           |
| Column A vs. Huh7                        | 0,519             | 0,1817 to 0,8563          | Yes                 | **                 | 0,0044                  | A-D       |          |           |
| Column B vs. HepG2                       | -0,5384           | -0,8539 to -0,2229        | Yes                 | **                 | 0,0022                  | B-C       |          |           |
| Column B vs. Huh7                        | -0,6971           | -1,013 to -0,3816         | Yes                 | ***                | 0,0003                  | B-D       |          |           |
| HepG2 vs. Huh7                           | -0,1587           | -0,4959 to 0,1786         | No                  | ns                 | 0,4924                  | C-D       |          |           |
|                                          |                   |                           |                     |                    |                         |           |          |           |
| <b>Test details</b>                      | <b>Mean 1</b>     | <b>Mean 2</b>             | <b>Mean Diff,</b>   | <b>SE of diff,</b> | <b>n1</b>               | <b>n2</b> | <b>q</b> | <b>DF</b> |
| Column A vs. Column B                    | 1,313             | 0,09725                   | 1,216               | 0,1011             | 3                       | 4         | 17,02    | 9         |
| Column A vs. HepG2                       | 1,313             | 0,6357                    | 0,6777              | 0,108              | 3                       | 3         | 8,871    | 9         |
| Column A vs. Huh7                        | 1,313             | 0,7943                    | 0,519               | 0,108              | 3                       | 3         | 6,794    | 9         |
| Column B vs. HepG2                       | 0,09725           | 0,6357                    | -0,5384             | 0,1011             | 4                       | 3         | 7,535    | 9         |
| Column B vs. Huh7                        | 0,09725           | 0,7943                    | -0,6971             | 0,1011             | 4                       | 3         | 9,755    | 9         |
| HepG2 vs. Huh7                           | 0,6357            | 0,7943                    | -0,1587             | 0,108              | 3                       | 3         | 2,077    | 9         |

**Table S22.** Values of test statistics of ketone bodies analyses (Figure 5E). P values of 0.05 or less were considered significant (\*\*  $p \leq 0.01$ ).

|                                          |                   |                           |                     |                    |                         |           |          |           |
|------------------------------------------|-------------------|---------------------------|---------------------|--------------------|-------------------------|-----------|----------|-----------|
| Number of families                       | 1                 |                           |                     |                    |                         |           |          |           |
| Number of comparisons per family         | 6                 |                           |                     |                    |                         |           |          |           |
| Alpha                                    | 0,05              |                           |                     |                    |                         |           |          |           |
|                                          |                   |                           |                     |                    |                         |           |          |           |
| <b>Tukey's multiple comparisons test</b> | <b>Mean Diff,</b> | <b>95,00% CI of diff,</b> | <b>Significant?</b> | <b>Summary</b>     | <b>Adjusted P Value</b> |           |          |           |
| Column A vs. Column B                    | -0,02258          | -0,04912 to 0,003952      | No                  | ns                 | 0,1004                  | A-B       |          |           |
| Column A vs. HepG2                       | 0,019             | -0,009368 to 0,04737      | No                  | ns                 | 0,2268                  | A-C       |          |           |
| Column A vs. Huh7                        | 0,018             | -0,01037 to 0,04637       | No                  | ns                 | 0,2633                  | A-D       |          |           |
| Column B vs. HepG2                       | 0,04158           | 0,01505 to 0,06812        | Yes                 | **                 | 0,0039                  | B-C       |          |           |
| Column B vs. Huh7                        | 0,04058           | 0,01405 to 0,06712        | Yes                 | **                 | 0,0046                  | B-D       |          |           |
| HepG2 vs. Huh7                           | -0,001            | -0,02937 to 0,02737       | No                  | ns                 | 0,9995                  | C-D       |          |           |
|                                          |                   |                           |                     |                    |                         |           |          |           |
| <b>Test details</b>                      | <b>Mean 1</b>     | <b>Mean 2</b>             | <b>Mean Diff,</b>   | <b>SE of diff,</b> | <b>n1</b>               | <b>n2</b> | <b>q</b> | <b>DF</b> |
| Column A vs. Column B                    | 0,02167           | 0,04425                   | -0,02258            | 0,0085             | 3                       | 4         | 3,757    | 9         |
| Column A vs. HepG2                       | 0,02167           | 0,002667                  | 0,019               | 0,009087           | 3                       | 3         | 2,957    | 9         |
| Column A vs. Huh7                        | 0,02167           | 0,003667                  | 0,018               | 0,009087           | 3                       | 3         | 2,801    | 9         |
| Column B vs. HepG2                       | 0,04425           | 0,002667                  | 0,04158             | 0,0085             | 4                       | 3         | 6,918    | 9         |
| Column B vs. Huh7                        | 0,04425           | 0,003667                  | 0,04058             | 0,0085             | 4                       | 3         | 6,752    | 9         |
| HepG2 vs. Huh7                           | 0,002667          | 0,003667                  | -0,001              | 0,009087           | 3                       | 3         | 0,1556   | 9         |

**Table S23.** Values of test statistics of lipid storage analyses (Figure 5F).

|                                          |                   |                           |                     |                    |                         |           |          |           |
|------------------------------------------|-------------------|---------------------------|---------------------|--------------------|-------------------------|-----------|----------|-----------|
| Number of families                       | 1                 |                           |                     |                    |                         |           |          |           |
| Number of comparisons per family         | 6                 |                           |                     |                    |                         |           |          |           |
| Alpha                                    | 0,05              |                           |                     |                    |                         |           |          |           |
|                                          |                   |                           |                     |                    |                         |           |          |           |
| <b>Tukey's multiple comparisons test</b> | <b>Mean Diff,</b> | <b>95,00% CI of diff,</b> | <b>Significant?</b> | <b>Summary</b>     | <b>Adjusted P Value</b> |           |          |           |
| Column A vs. Column B                    | -0,1142           | -0,3435 to 0,1152         | No                  | ns                 | 0,4479                  | A-B       |          |           |
| Column A vs. HepG2                       | 0,031             | -0,2142 to 0,2762         | No                  | ns                 | 0,9779                  | A-C       |          |           |
| Column A vs. Huh7                        | 0,027             | -0,2182 to 0,2722         | No                  | ns                 | 0,9851                  | A-D       |          |           |
| Column B vs. HepG2                       | 0,1452            | -0,08416 to 0,3745        | No                  | ns                 | 0,265                   | B-C       |          |           |
| Column B vs. Huh7                        | 0,1412            | -0,08816 to 0,3705        | No                  | ns                 | 0,2848                  | B-D       |          |           |
| HepG2 vs. Huh7                           | -0,004            | -0,2492 to 0,2412         | No                  | ns                 | >0,9999                 | C-D       |          |           |
|                                          |                   |                           |                     |                    |                         |           |          |           |
| <b>Test details</b>                      | <b>Mean 1</b>     | <b>Mean 2</b>             | <b>Mean Diff,</b>   | <b>SE of diff,</b> | <b>n1</b>               | <b>n2</b> | <b>q</b> | <b>DF</b> |
| Column A vs. Column B                    | 0,03533           | 0,1495                    | -0,1142             | 0,07346            | 3                       | 4         | 2,198    | 9         |
| Column A vs. HepG2                       | 0,03533           | 0,004333                  | 0,031               | 0,07853            | 3                       | 3         | 0,5582   | 9         |
| Column A vs. Huh7                        | 0,03533           | 0,008333                  | 0,027               | 0,07853            | 3                       | 3         | 0,4862   | 9         |
| Column B vs. HepG2                       | 0,1495            | 0,004333                  | 0,1452              | 0,07346            | 4                       | 3         | 2,795    | 9         |
| Column B vs. Huh7                        | 0,1495            | 0,008333                  | 0,1412              | 0,07346            | 4                       | 3         | 2,718    | 9         |
| HepG2 vs. Huh7                           | 0,004333          | 0,008333                  | -0,004              | 0,07853            | 3                       | 3         | 0,07203  | 9         |
